# Supplementary material for: Analyzing perceptions of a global event using CNN-LSTM deep learning approach: the case of Hajj 1442 (2021)
Source: PeerJ Comput Sci. 2022 Sep 20;8:e1087. doi: 10.7717/peerj-cs.1087 (PMC9575857; doi:10.7717/peerj-cs.1087)
Supplement: Supplemental Information 1 — Tweet and Youtube Comments. [file peerj-cs-08-1087-s001.xlsx]

## Sheet: File Guide
There are two sheets for three YouTube channels in this file (in addition to the present one): 1. Saudi Quran Channel 2. Al-Arabia Channel Each sheet contains a set of comments belonging to a particular channel and other attributes, including Date, Time, Uptated At, LikeCount, and Total Reply Count.

## Sheet: Saudi Quran Channel 
Comment ID	Text Comments-Arabic	Text Comments -English	Date	Time	Uptated At	LikeCount	Total Reply Count
1	لبيك الله اللهم لبيك لبيك لاشريك لك لبيك ان الحمده والنعمه للك والمللك لاشريك للك اللهم بحق هذي الايام المباركه انك تنجح كل طلاب ونطلع احسن معدلات وكل طالب وطالبه يفرح اهله ب احلى نتيجه واحلى كليه يارب والصحه والعافيه للجميع يارب	I respond to Your call O Allah! I respond to Your call. You have no partner. I respond to Your call. All praise, thanks and blessings are for You. O Allah, for the sake of these blessed days, make all students successful and make them obtain the best grades.	2021-07-18	23:58:11	2021-07-19T00:03:04Z	3	0
2	لبيك اللهم لبيك لبيك لا شريك لك لبيك انه الحمد والنعمه لك الملك لاشريك لك لبيك	I respond to Your call O Allah! I respond to Your call. You have no partner. I respond to Your call. All praise, thanks and blessings are for You	2021-07-18	23:54:16	2021-07-18T23:54:16Z	2	0
3	لا حول ولا قوة الا بالله	There is no power and might except by Allah	2021-07-18	23:50:18	2021-07-18T23:50:18Z	0	0
4	اللهم زد هذا البيت تشريفا وتعظيما وتكريما وامنا وامان 💚	Oh God, increase this house, honor, glorification, honor, security and safety 💚	2021-07-18	23:40:06	2021-07-18T23:40:06Z	4	0
5	is that 2021 kiswah changing video??	Is that 2021 Kiswah Changing Video ??	2021-07-18	23:37:52	2021-07-18T23:37:52Z	1	0
6	الذين آمنوا وتطمئن قلوبهم بذكر الله ألا بذكر الله تطمئن القلوب	Those who believe and find peace in their hearts with the remembrance of God, only in the remembrance of God do hearts find rest	2021-07-18	23:34:48	2021-07-18T23:34:48Z	2	0
7	ادعوللوالد برحمه الله يجزاكم خير	pray to my father for mercy, may God have mercy on you	2021-07-18	23:32:32	2021-07-18T23:32:32Z	0	1
8	بسم الله الرحمن الرحيم قل هو الله احد الله الصمد لم يلد ولم يولد ولم يكن له كفوا احد	In the name of God, the Most Gracious, the Most Merciful. Say, "He is Allāh, [who is] One, Allāh, the Eternal Refuge, He neither begets nor is born,Nor is there to Him any equivalent.	2021-07-18	23:24:53	2021-07-18T23:24:53Z	2	0
9	لا اله الا الله	No God except Allah	2021-07-18	23:24:21	2021-07-18T23:24:21Z	2	0
10	لا اله الا انت سبحانك اني كنت من الظالمين	no god but You Glory I oppressors	2021-07-18	23:19:43	2021-07-18T23:19:43Z	2	0
11	اعوذ بكلمات الله التامات من شر ما خلق	I seek refuge in perfect words of Allah from the evil of what He has created	2021-07-18	23:18:44	2021-07-18T23:18:44Z	1	0
12	الله اكبر الله اكبر الله اكبر لا اله الا الله الله اكبر الله اكبر ولله الحمد الله أكبر كبيرا والحمد لله كثيرا وسبحان الله بكرة وأصيلا وصل الله على سيدنا محمد وعلى آله وصحبه وسلم تسليما كثيرا	God is great, God is great, God is great. There is no god but God, God is great, and praise be to God, great great. Praise be to God a lot.	2021-07-18	23:17:32	2021-07-18T23:17:32Z	1	0
13	لبيك اللهم لبيك لبيك لا شريك لك لبيك إن الحمد والنعمة لك والملك لا شريك لك	To you, O God, to you, for you, there is no partner for you.	2021-07-18	23:17:05	2021-07-18T23:17:05Z	3	0
14	Asalamu aleykum everyone may beloved Brothers and dear beloved Sisters in Islam 💐🕋Allahu Akbar 🕋💐🕋 La ilalaha ilallah🕋♥️💐🕋 Alhamdullilah 🕋💐♥️Allahu Akbar 💐SubhanAllah	Assalmu Aleykum everyone May Beloves Brothers and Dear Beloored Sisters in Islam 💐🕋allahu akbar 🕋💐🕋 la ibahaha ilallah🕋 ♥ ️💐🕋 alhamdulilah 🕋💐 ♥ ️allahu akbar 💐subhanallah	2021-07-18	23:16:11	2021-07-18T23:16:11Z	3	1
15	استغفر الله العظيم واتوب اليه	Ask forgiveness of Almighty God and repent to Him	2021-07-18	23:16:11	2021-07-18T23:16:11Z	2	0
16	اللهم صل على محمد وعلى آل محمد كما صليت على ابراهيم وعلى ال ابراهيم انك حميد مجيد وبارك على محمد وآل محمد كما باركت على إبراهيم وعلى آل إبراهيم إنك حميد مجيد	O Allah, bless Muhammad and the family of Muhammad as You have blessed Ibrahim and the family of Ibrahim, You are Praiseworthy, Most Glorious.	2021-07-18	23:15:53	2021-07-18T23:15:53Z	2	0
17	اللهم ارزقنا حجة إلى بيت الله الحرام 🤲🤲🤲🤲🤲	Oh God, grant us an argument to the Sacred House of God 🤲🤲🤲🤲🤲	2021-07-18	23:15:47	2021-07-18T23:15:47Z	2	0
18	سبحان الله العظيم	Glory be to God the Great	2021-07-18	23:15:13	2021-07-18T23:15:13Z	1	0
19	سبحان الله وبحمده	Glory be to God and praise be to Him	2021-07-18	23:15:04	2021-07-18T23:15:04Z	2	0
20	ما شاء الله	what Allah has willed has happened	2021-07-18	23:14:54	2021-07-18T23:14:54Z	1	0
21	سبحان الله وبحمده عدد خلقه ورضا نفسه وزنة عرشه ومداد كلماته	How perfect Allah is and I praise Him by the number of His creation and His pleasure, and by the weight of His throne, and the ink of His words.4	2021-07-18	23:14:13	2021-07-18T23:14:13Z	3	0
22	رضيت بالله ربا وبالإسلام دينا وبمحمد صلى الله عليه وسلم نبينا محمد وعلى آله وصحبه اجمعين	I am satisfied with God my Lord, Islam as a religion, and with Muhammad, may God’s prayers and peace be upon him, our Prophet, and may God’s peace and blessings be upon Muhammad and all his family and companions.	2021-07-18	23:13:54	2021-07-18T23:13:54Z	1	0
23	لا اله الا الله محمد رسول الله	There is no God but Allah, Muhammad is the prophet of Allah	2021-07-18	23:13:20	2021-07-18T23:13:20Z	1	0
24	الله الله ربي لا شريك به شيئا	God is my Lord, I do not associate anything with Him	2021-07-18	23:12:56	2021-07-18T23:12:56Z	2	0
25	سبحان الله والحمدلله ولاإله إلا الله الله اكبر	Glory be to God, praise be to God, and there is no God except Allah, Allah is the greatest	2021-07-18	23:12:40	2021-07-18T23:12:40Z	2	0
26	حسبي الله لاإله إلا هو عليه توكلت وهو رب العرش العظيم	God is enough for me. There is no god but Him. I trust in Him, and He is the Lord of the Great Throne	2021-07-18	23:12:18	2021-07-18T23:12:18Z	8	0
27	لا اله إلا الله وحده لاشريك له له الملك وله الحمد وهو على كل شيء قدير	There is no God but Allah alone. There is no partner for him the king, and praise be to him, and he is capable of everything	2021-07-18	23:12:04	2021-07-18T23:12:04Z	1	0
28	لا حول ولاقوة الابالله	There is no power and might except by Allah	2021-07-18	23:11:29	2021-07-18T23:11:29Z	1	0
29	اللهم اجرني من النار	O God spare me from hell	2021-07-18	23:11:15	2021-07-18T23:11:15Z	2	0
30	اللهم انت ربي لا إله إلا انت خلقتني وانا عبدك وانا على عهدك وو عدك ما استطعت اعوذ بك من شر ما صنعت أبو ء لك بنعمتك على وابوء بذنبي فاغفر لي فإنه لا يغفر الذنوب الا انت	Oh God, you are my Lord, there is no god but you created me, and I am your servant, and I am on your covenant.	2021-07-18	23:10:59	2021-07-18T23:10:59Z	18	0
31	القرآن أنزله الله للتدبر والعمل وليس للزينة أليس منهم رجل رشيد؟	The Qur’an was revealed by God for contemplation and work, not for adornment. Is there not a wise man among them?	2021-07-18	23:10:46	2021-07-18T23:10:46Z	5	1
32	اللهم إنك عفو كريم تحب العفو فعفو عنا	Oh God, you are a generous pardon, you love pardon, so forgive us	2021-07-18	23:10:23	2021-07-18T23:10:23Z	2	0
33	لا اله الا الله	No God except Allah	2021-07-18	23:09:54	2021-07-18T23:09:54Z	3	0
34	اللهم صل وسلم على نبينا محمد	O Allah, bless our Prophet Muhammad	2021-07-18	23:09:43	2021-07-18T23:09:43Z	2	0
35	استغفر الله العظيم الذي لااله الا هو الحي القيوم وأتوب إليه	Ask forgiveness of God Almighty, who has no god but He is the living, and I repent to Him	2021-07-18	23:09:19	2021-07-18T23:09:19Z	2	0
36	Mashallah	MASHALLAH	2021-07-18	23:09:07	2021-07-18T23:09:07Z	0	0
37	ربي اغفر لي ولوالدي وللمؤمنين والمؤمنات والمسلمين والمسلمات الاحياء منهم والاموات اللهم لك الحمد والشكر كما ينبغي لجلال وجهك وعظيم سلطانك اللهم صل وسلم وبارك على نبينا محمد وعلى اله وصحبه اجمعين لا اله الا الله وحده لا شريك له له الملك وله الحمد وهو على كل شيء قدير لا حول ولا قوه الا بالله العلي العظيم سبحان الله وبحمده سبحان الله العظيم	My Lord, forgive me, my parents, the believers, the believers, the Muslims, and the Muslim women, from them, and the dead, O God, praise and thanksgiving as it should be for the majesty of your face and the greatness of your authority, O God, bless and bless our Prophet Muhammad and his family and companions all, there is no god but God alone who has no partner who has the king and he has praise …	2021-07-18	23:09:04	2021-07-18T23:09:04Z	1	0
38	استغفر الله واتوب اليه	God's forgiveness and repent to Him	2021-07-18	23:08:47	2021-07-18T23:08:47Z	1	0
39	سبحان الله وبحمده سبحان الله العظيم	Hallelujah and praise, Hallelujah great	2021-07-18	23:08:38	2021-07-18T23:08:38Z	1	0
40	لبيك اللهم لبيك لبيك لا شريك لك لبيك ان الحمد و النعمة لك والملك لا شريك لك	I respond to Your call O Allah! I respond to Your call. You have no partner. I respond to Your call. All praise, thanks and blessings are for You.	2021-07-18	23:08:26	2021-07-18T23:08:26Z	6	0
41	Alhamdulillah ♥ AMEEN ♥ ♡ ♥ ♡ ♥ AMEEN Alhamdulillah AMEEN	Alhamdulillah ♥ Ameen ♥ ♡ ♥ ♡ ♥ Ameen Alhamdulilah Ameen	2021-07-18	23:07:25	2021-07-18T23:07:25Z	0	0
42	لبيك الله الهم لبيك	I respond to Your call O Allah! I respond to Your call.	2021-07-18	23:02:10	2021-07-18T23:02:10Z	0	0
43	❤❤❤❤	['❤❤❤❤']	2021-07-18	22:51:47	2021-07-18T22:51:47Z	0	0
44	ماشاءالله. سبحان الله	Mashallah. How great is our God	2021-07-18	22:44:42	2021-07-18T22:44:42Z	4	0
45	اللهم صلي وسلم على نبينا محمد وعلى آله وصحبه أجمعين	O Allah, blessings and peace be upon our Prophet Muhammad and his family and companions	2021-07-18	22:39:56	2021-07-18T22:39:56Z	5	0
46	اللهم اني أسالك حجة أو عمرة يارب	Oh God, I ask you Hajj or Umrah, Lord	2021-07-18	22:36:10	2021-07-18T22:36:10Z	6	0
47	لبيك اللهم لبيك لبيك لا شريك لك لبيك ان الحمده ونعمته لك والملك لا شريك لك.	I respond to Your call O Allah! I respond to Your call. You have no partner. I respond to Your call. All praise, thanks and blessings are for You	2021-07-18	22:33:39	2021-07-18T22:33:39Z	23	0
48	اللهم صل وسلم على نبينا محمد صلى الله عليه وسلم	O Allah, bless our Prophet Muhammad, may God bless him and grant him peace	2021-07-18	22:32:26	2021-07-18T22:32:26Z	5	0
49	اللهم صل على محمد❣️	O Allah, bless Muhammad ❣️	2021-07-18	22:27:48	2021-07-18T22:27:48Z	6	0
50	Mashaallah	['Mashaallah']	2021-07-18	22:27:38	2021-07-18T22:27:38Z	0	0
51	ماشاءالله لاقوةالابالله اللهم بارك	Masha'Allah, God bless you	2021-07-18	22:26:06	2021-07-18T22:26:06Z	2	0
52	Allahumma sholli 'alaa sayyidinaa Muhammad wa 'sla Alihi wa sohbihi ajmaiin....	Allahumma Sholli 'Alaa Sayyidinaa Muhammad Wa' Sla Alihi Wa Sohbihi Ajmaiin ....	2021-07-18	22:24:50	2021-07-18T22:24:50Z	1	0
53	اللهم صلي علي سيدنا محمد	The blessings of God to the Prophet Muhammad	2021-07-18	22:24:34	2021-07-18T22:24:34Z	1	0
54	ماشالله الله اكبر	God bless you	2021-07-18	22:24:10	2021-07-18T22:24:10Z	1	0
55	اللهم ارزقنا حجة او عمرة يارب	Oh God, grant us Hajj or Umrah, Lord	2021-07-18	22:22:04	2021-07-18T22:22:04Z	14	0
56	اللهم صلي وسلم على نبينا محمد وعلى آله وصحبه أجمعين	O Allah, blessings and peace be upon our Prophet Muhammad and his family and companions	2021-07-18	22:21:04	2021-07-18T22:21:04Z	13	0
57	اللهم أرزقنا حجات إلى بيتك والمسلمين	Oh God, grant us pilgrims to your home and Muslims	2021-07-18	22:20:11	2021-07-18T22:20:11Z	26	2
58	ماشاء الله	God willing	2021-07-18	22:19:17	2021-07-18T22:19:17Z	2	0
59	Mashaalh ❣❣	MASHAALH ❣❣	2021-07-18	22:19:01	2021-07-18T22:19:01Z	1	0
60	استغفر الله العظيم واتوب اليه عدد البشر وعدد اوراق الشجر...	I ask forgiveness from God Almighty and repent to Him the number of humans and the number of trees ...	2021-07-19	22:29:59	2021-07-19T22:29:59Z	1	0
61	اللهم زد هذا البيت تشريفا ومهابة وتعظيما وارزقنا زيارته قبل الممات .	Oh God, increase this house, honor, prestige, and glorify, and grant us a visit before death.	2021-07-19	20:11:58	2021-07-19T20:11:58Z	0	0
62	اللهم صلى على محمد وآل محمد	The blessings of God to Muhammad and his family	2021-07-19	19:00:01	2021-07-19T19:00:01Z	1	0
63	لبيك اللهم لبيك لبيك لا شريك لك لبيك ان الحمده ونعمته لك والملك لا شريك لك.	I respond to Your call O Allah! I respond to Your call. You have no partner. I respond to Your call. All praise, thanks and blessings are for You	2021-07-19	15:52:30	2021-07-19T15:52:30Z	0	0
64	اللهم ارزقنا زيارة بيتك الحرام وحبيبك سيدنا محمد صلى الله عليه وسلم حبيي يا رسول الله أفضل خير الله وأفضل من مشي علي هذه الأرض حبيبنا وشفيعنا محمد	Oh God, grant us the visit of your house and your beloved, our prophet Muhammad, may God bless him and grant him peace	2021-07-19	15:33:42	2021-07-19T15:33:42Z	0	0
65	🌺🌺اللهم لك الحمد كما أنت أهله و وليه.. اللهم لك الحمد كما ينبغي لجلال وجهك و عظيم سلطانك ...اللهم لك الحمد حمدا لا ينفد أوله و لا ينقطع آخره ...اللهم لك الحمد فأنت أهل أن تشكر و تحمد و تعبد يا أرحم الراحمين يا رب العالمين🌺🌺	🌺🌺 Oh God, praise be to you.. Oh God, praise be to you what should be of the greatness of your face and your great authority... God is for you and praise be to God. It is inexhaustible in its beginning, and its end will not be interrupted.. God be praised.	2021-07-19	14:23:06	2021-07-19T14:23:06Z	0	0
66	لا اله إلا الله وحده لا شريك له له الملك وله الحمد وهو على كل شيء قدير.	There is no god but God alone who has no partner, and he has praise, and he is capable of everything.	2021-07-19	14:00:54	2021-07-19T14:00:54Z	0	0
67	لبيك اللهم لبيك لبيك لا شريك لك لبيك ان الحمد والنعمة لك والملك لا شريك لك.	I respond to Your call O Allah! I respond to Your call. You have no partner. I respond to Your call. All praise, thanks and blessings are for You	2021-07-19	13:59:39	2021-07-19T13:59:39Z	0	0
68	ماشاء الله وتبا ر ك الله	God bless you	2021-07-19	13:58:37	2021-07-19T13:58:37Z	0	0
69	امين ماشاء الله❤❤❤❤❤❤❤❤❤❤🤲🤲🤲🤲🤲🤲🤲🤲🤲🤲🤲🤲🤲❤❤❤❤❤❤❤❤❤🤲🤲🤲🤲🤲🤲🤲🤲❤❤❤❤❤❤❤❤🤲🤲🤲🤲❤❤❤❤❤❤❤❤🤲🤲🤲🤲🤲🤲❤❤❤❤❤❤❤🤲🤲🤲🤲🤲🤲❤❤❤❤❤❤❤❤❤❤❤❤❤❤❤❤🤲🤲🤲🤲🤲🤲🤲🤲🤲🤲🤲❤❤❤❤❤❤❤❤❤❤🤲❤❤❤❤❤❤❤❤❤❤🤲🤲🤲🤲🤲🤲🤲🤲🤲❤❤❤❤❤❤❤🤲🤲🤲🤲🤲❤❤❤❤❤❤❤🤲🤲🤲🤲	Amen, God willing ❤🤲🤲🤲🤲❤❤❤❤❤❤❤❤❤❤❤❤❤❤❤❤❤❤❤❤❤❤❤❤❤❤❤❤❤❤❤❤ 🤲🤲🤲🤲🤲🤲🤲🤲🤲❤❤❤❤❤❤❤❤❤❤❤❤❤❤❤❤❤❤❤❤❤❤❤❤❤❤❤❤ 🤲❤❤❤❤❤❤🤲🤲🤲🤲	2021-07-19	13:58:14	2021-07-19T13:58:14Z	0	0
70	امين ماشاء الله❤❤❤❤❤❤❤❤❤❤🤲🤲🤲🤲🤲🤲🤲🤲🤲🤲🤲🤲🤲❤❤❤❤❤❤❤❤❤🤲🤲🤲🤲🤲🤲🤲🤲❤❤❤❤❤❤❤❤🤲🤲🤲🤲❤❤❤❤❤❤❤❤🤲🤲🤲🤲🤲🤲❤❤❤❤❤❤❤🤲🤲🤲🤲🤲🤲❤❤❤❤❤❤❤❤❤❤❤❤❤❤❤❤🤲🤲🤲🤲🤲🤲🤲🤲🤲🤲🤲❤❤❤❤❤❤❤❤❤❤🤲❤❤❤❤❤❤❤❤❤❤🤲🤲🤲🤲🤲🤲🤲🤲🤲❤❤❤❤❤❤❤🤲🤲🤲🤲🤲❤❤❤❤❤❤❤🤲🤲🤲🤲	Amen, God willing ❤🤲🤲🤲🤲❤❤❤❤❤❤❤❤❤❤❤❤❤❤❤❤❤❤❤❤❤❤❤❤❤❤❤❤❤❤❤❤ 🤲🤲🤲🤲🤲🤲🤲🤲🤲❤❤❤❤❤❤❤❤❤❤❤❤❤❤❤❤❤❤❤❤❤❤❤❤❤❤❤❤ 🤲❤❤❤❤❤❤🤲🤲🤲🤲	2021-07-19	13:58:10	2021-07-19T13:58:10Z	0	0
71	امين ماشاء الله❤❤❤❤❤❤❤❤❤❤🤲🤲🤲🤲🤲🤲🤲🤲🤲🤲🤲🤲🤲❤❤❤❤❤❤❤❤❤🤲🤲🤲🤲🤲🤲🤲🤲❤❤❤❤❤❤❤❤🤲🤲🤲🤲❤❤❤❤❤❤❤❤🤲🤲🤲🤲🤲🤲❤❤❤❤❤❤❤🤲🤲🤲🤲🤲🤲❤❤❤❤❤❤❤❤❤❤❤❤❤❤❤❤🤲🤲🤲🤲🤲🤲🤲🤲🤲🤲🤲❤❤❤❤❤❤❤❤❤❤🤲❤❤❤❤❤❤❤❤❤❤🤲🤲🤲🤲🤲🤲🤲🤲🤲❤❤❤❤❤❤❤🤲🤲🤲🤲🤲❤❤❤❤❤❤❤🤲🤲🤲🤲	Amen, God willing ❤🤲🤲🤲🤲❤❤❤❤❤❤❤❤❤❤❤❤❤❤❤❤❤❤❤❤❤❤❤❤❤❤❤❤❤❤❤❤ 🤲🤲🤲🤲🤲🤲🤲🤲🤲❤❤❤❤❤❤❤❤❤❤❤❤❤❤❤❤❤❤❤❤❤❤❤❤❤❤❤❤ 🤲❤❤❤❤❤❤🤲🤲🤲🤲	2021-07-19	13:58:01	2021-07-19T13:58:01Z	0	0
72	امين ماشاء الله❤❤❤❤❤❤❤❤❤❤🤲🤲🤲🤲🤲🤲🤲🤲🤲🤲🤲🤲🤲❤❤❤❤❤❤❤❤❤🤲🤲🤲🤲🤲🤲🤲🤲❤❤❤❤❤❤❤❤🤲🤲🤲🤲❤❤❤❤❤❤❤❤🤲🤲🤲🤲🤲🤲❤❤❤❤❤❤❤🤲🤲🤲🤲🤲🤲❤❤❤❤❤❤❤❤❤❤❤❤❤❤❤❤🤲🤲🤲🤲🤲🤲🤲🤲🤲🤲🤲❤❤❤❤❤❤❤❤❤❤🤲❤❤❤❤❤❤❤❤❤❤🤲🤲🤲🤲🤲🤲🤲🤲🤲❤❤❤❤❤❤❤🤲🤲🤲🤲🤲❤❤❤❤❤❤❤🤲🤲🤲🤲	Amen, God willing ❤🤲🤲🤲🤲❤❤❤❤❤❤❤❤❤❤❤❤❤❤❤❤❤❤❤❤❤❤❤❤❤❤❤❤❤❤❤❤ 🤲🤲🤲🤲🤲🤲🤲🤲🤲❤❤❤❤❤❤❤❤❤❤❤❤❤❤❤❤❤❤❤❤❤❤❤❤❤❤❤❤ 🤲❤❤❤❤❤❤🤲🤲🤲🤲	2021-07-19	13:57:57	2021-07-19T13:57:57Z	0	0
73	امين ماشاء الله❤❤❤❤❤❤❤❤❤❤🤲🤲🤲🤲🤲🤲🤲🤲🤲🤲🤲🤲🤲❤❤❤❤❤❤❤❤❤🤲🤲🤲🤲🤲🤲🤲🤲❤❤❤❤❤❤❤❤🤲🤲🤲🤲❤❤❤❤❤❤❤❤🤲🤲🤲🤲🤲🤲❤❤❤❤❤❤❤🤲🤲🤲🤲🤲🤲❤❤❤❤❤❤❤❤❤❤❤❤❤❤❤❤🤲🤲🤲🤲🤲🤲🤲🤲🤲🤲🤲❤❤❤❤❤❤❤❤❤❤🤲❤❤❤❤❤❤❤❤❤❤🤲🤲🤲🤲🤲🤲🤲🤲🤲❤❤❤❤❤❤❤🤲🤲🤲🤲🤲❤❤❤❤❤❤❤🤲🤲🤲🤲	Amen, God willing ❤🤲🤲🤲🤲❤❤❤❤❤❤❤❤❤❤❤❤❤❤❤❤❤❤❤❤❤❤❤❤❤❤❤❤❤❤❤❤ 🤲🤲🤲🤲🤲🤲🤲🤲🤲❤❤❤❤❤❤❤❤❤❤❤❤❤❤❤❤❤❤❤❤❤❤❤❤❤❤❤❤ 🤲❤❤❤❤❤❤🤲🤲🤲🤲	2021-07-19	13:57:54	2021-07-19T13:57:54Z	0	0
74	امين ماشاء الله❤❤❤❤❤❤❤❤❤❤🤲🤲🤲🤲🤲🤲🤲🤲🤲🤲🤲🤲🤲❤❤❤❤❤❤❤❤❤🤲🤲🤲🤲🤲🤲🤲🤲❤❤❤❤❤❤❤❤🤲🤲🤲🤲❤❤❤❤❤❤❤❤🤲🤲🤲🤲🤲🤲❤❤❤❤❤❤❤🤲🤲🤲🤲🤲🤲❤❤❤❤❤❤❤❤❤❤❤❤❤❤❤❤🤲🤲🤲🤲🤲🤲🤲🤲🤲🤲🤲❤❤❤❤❤❤❤❤❤❤🤲❤❤❤❤❤❤❤❤❤❤🤲🤲🤲🤲🤲🤲🤲🤲🤲❤❤❤❤❤❤❤🤲🤲🤲🤲🤲❤❤❤❤❤❤❤🤲🤲🤲🤲	Amen, God willing ❤🤲🤲🤲🤲❤❤❤❤❤❤❤❤❤❤❤❤❤❤❤❤❤❤❤❤❤❤❤❤❤❤❤❤❤❤❤❤ 🤲🤲🤲🤲🤲🤲🤲🤲🤲❤❤❤❤❤❤❤❤❤❤❤❤❤❤❤❤❤❤❤❤❤❤❤❤❤❤❤❤ 🤲❤❤❤❤❤❤🤲🤲🤲🤲	2021-07-19	13:57:50	2021-07-19T13:57:50Z	0	0
75	امين ماشاء الله❤❤❤❤❤❤❤❤❤❤🤲🤲🤲🤲🤲🤲🤲🤲🤲🤲🤲🤲🤲❤❤❤❤❤❤❤❤❤🤲🤲🤲🤲🤲🤲🤲🤲❤❤❤❤❤❤❤❤🤲🤲🤲🤲❤❤❤❤❤❤❤❤🤲🤲🤲🤲🤲🤲❤❤❤❤❤❤❤🤲🤲🤲🤲🤲🤲❤❤❤❤❤❤❤❤❤❤❤❤❤❤❤❤🤲🤲🤲🤲🤲🤲🤲🤲🤲🤲🤲❤❤❤❤❤❤❤❤❤❤🤲❤❤❤❤❤❤❤❤❤❤🤲🤲🤲🤲🤲🤲🤲🤲🤲❤❤❤❤❤❤❤🤲🤲🤲🤲🤲❤❤❤❤❤❤❤🤲🤲🤲🤲	Amen, God willing ❤🤲🤲🤲🤲❤❤❤❤❤❤❤❤❤❤❤❤❤❤❤❤❤❤❤❤❤❤❤❤❤❤❤❤❤❤❤❤ 🤲🤲🤲🤲🤲🤲🤲🤲🤲❤❤❤❤❤❤❤❤❤❤❤❤❤❤❤❤❤❤❤❤❤❤❤❤❤❤❤❤ 🤲❤❤❤❤❤❤🤲🤲🤲🤲	2021-07-19	13:57:47	2021-07-19T13:57:47Z	0	0
76	امين ماشاء الله❤❤❤❤❤❤❤❤❤❤🤲🤲🤲🤲🤲🤲🤲🤲🤲🤲🤲🤲🤲❤❤❤❤❤❤❤❤❤🤲🤲🤲🤲🤲🤲🤲🤲❤❤❤❤❤❤❤❤🤲🤲🤲🤲❤❤❤❤❤❤❤❤🤲🤲🤲🤲🤲🤲❤❤❤❤❤❤❤🤲🤲🤲🤲🤲🤲❤❤❤❤❤❤❤❤❤❤❤❤❤❤❤❤🤲🤲🤲🤲🤲🤲🤲🤲🤲🤲🤲❤❤❤❤❤❤❤❤❤❤🤲❤❤❤❤❤❤❤❤❤❤🤲🤲🤲🤲🤲🤲🤲🤲🤲❤❤❤❤❤❤❤🤲🤲🤲🤲🤲❤❤❤❤❤❤❤🤲🤲🤲🤲	Amen, God willing ❤🤲🤲🤲🤲❤❤❤❤❤❤❤❤❤❤❤❤❤❤❤❤❤❤❤❤❤❤❤❤❤❤❤❤❤❤❤❤ 🤲🤲🤲🤲🤲🤲🤲🤲🤲❤❤❤❤❤❤❤❤❤❤❤❤❤❤❤❤❤❤❤❤❤❤❤❤❤❤❤❤ 🤲❤❤❤❤❤❤🤲🤲🤲🤲	2021-07-19	13:57:42	2021-07-19T13:57:42Z	0	0
77	امين ماشاء الله❤❤❤❤❤❤❤❤❤❤🤲🤲🤲🤲🤲🤲🤲🤲🤲🤲🤲🤲🤲❤❤❤❤❤❤❤❤❤🤲🤲🤲🤲🤲🤲🤲🤲❤❤❤❤❤❤❤❤🤲🤲🤲🤲❤❤❤❤❤❤❤❤🤲🤲🤲🤲🤲🤲❤❤❤❤❤❤❤🤲🤲🤲🤲🤲🤲❤❤❤❤❤❤❤❤❤❤❤❤❤❤❤❤🤲🤲🤲🤲🤲🤲🤲🤲🤲🤲🤲❤❤❤❤❤❤❤❤❤❤🤲❤❤❤❤❤❤❤❤❤❤🤲🤲🤲🤲🤲🤲🤲🤲🤲❤❤❤❤❤❤❤🤲🤲🤲🤲🤲❤❤❤❤❤❤❤🤲🤲🤲🤲	Amen, God willing ❤🤲🤲🤲🤲❤❤❤❤❤❤❤❤❤❤❤❤❤❤❤❤❤❤❤❤❤❤❤❤❤❤❤❤❤❤❤❤ 🤲🤲🤲🤲🤲🤲🤲🤲🤲❤❤❤❤❤❤❤❤❤❤❤❤❤❤❤❤❤❤❤❤❤❤❤❤❤❤❤❤ 🤲❤❤❤❤❤❤🤲🤲🤲🤲	2021-07-19	13:57:34	2021-07-19T13:57:34Z	0	0
78	الحمدلله	Thank God	2021-07-19	10:29:16	2021-07-19T10:29:16Z	1	0
79	اذكروني بدعوه لعلي ٲسعد بها دومآ ...ولكم بالمثل 🤍اللهم أسعد كل نفس دعت لِي بِعلمي أو بغيرعلميَ ... وَ حققَ لها مرادها ، ولا تحرمها أجر نيتها ، وردّ عليهم أجر دعواتهم أضعاف مضاعفة ...! 🌹	Remember me with a supplication that I may always be happy with... and for you the same. Oh God, make every one who prays for me with or without my knowledge happy ... 🌹	2021-07-19	10:09:55	2021-07-19T10:09:55Z	0	0
80	اللهم زده تشريفا	Oh God, give it more honor	2021-07-19	10:09:43	2021-07-19T10:09:43Z	0	0
81	❤❤	['❤❤']	2021-07-19	09:23:41	2021-07-19T09:23:41Z	0	0
82	عندي سؤال فضولي ماذا يفعلون بالكسوة القديمة ؟؟	I have a curious question, what do they do with old clothing ??	2021-07-19	09:11:23	2021-07-19T09:11:23Z	0	1
83	هنيئا لكم بخدمة بيت الله 😍😍 انعم به واكرم وانتم اهل لذلك 🌺🌺 حفظ الله المملكة	Congratulations to you for serving the house of God 😍😍 He was blessed and honored, and you are the people of that 🌺🌺 May God protect the Kingdom	2021-07-19	09:10:30	2021-07-19T09:10:30Z	0	0
84	❤❤❤❤❤❤❤	❤❤❤❤❤❤	2021-07-19	07:57:55	2021-07-19T07:57:55Z	0	0
85	باب كسوة الكعبة - البخاري1594 - حَدَّثَنَا عَبْدُ اللَّهِ بْنُ عَبْدِ الْوَهَّابِ حَدَّثَنَا خَالِدُ بْنُ الْحَارِثِ حَدَّثَنَا سُفْيَانُ حَدَّثَنَا وَاصِلٌ الأَحْدَبُ عَنْ أَبِى وَائِلٍ قَالَ جِئْتُ إِلَى شَيْبَةَ . وَحَدَّثَنَا قَبِيصَةُ حَدَّثَنَا سُفْيَانُ عَنْ وَاصِلٍ عَنْ أَبِى وَائِلٍ قَالَ جَلَسْتُ مَعَ شَيْبَةَ عَلَى الْكُرْسِىِّ فِى الْكَعْبَةِ فَقَالَ لَقَدْ جَلَسَ هَذَا الْمَجْلِسَ عُ…	The chapter of the Kiswah Al-Kaaba - Al -Bukhari 1594 - Abdullah ibn Abd al -Wahhab told us, Khalid Ibn Al -Harith told us, Safayan told us. وَحَدَّثَنَا قَبِيصَةُ حَدَّثَنَا سُفْيَانُ عَنْ وَاصِلٍ عَنْ أَبِى وَائِلٍ قَالَ جَلَسْتُ مَعَ شَيْبَةَ عَلَى الْكُرْسِىِّ فِى الْكَعْبَةِ فَقَالَ لَقَدْ جَلَسَ هَذَا الْمَجْلِسَ عُمَرُ - رضى الله عنه - فَقَالَ لَقَدْ هَمَمْتُ أَنْ لاَ أَدَعَ فِيهَا صَفْرَا…	2021-07-19	06:35:19	2021-07-19T06:35:19Z	0	0
86	أيتها الكعبة المباركة، زادك الله نورا وشرفا!	O blessed Kaaba, may God increase you light and honor!	2021-07-19	06:31:21	2021-07-19T06:31:21Z	0	0
87	اللهم صل وسلم وبارك على نبينا محمد	O Allah, bless and bless our Prophet Muhammad	2021-07-19	06:00:55	2021-07-19T06:00:55Z	1	0
88	subhanallah	Subhanallah	2021-07-19	05:35:57	2021-07-19T05:35:57Z	0	0
89	❤️❤️🥰😍😍💕😘	['❤️❤️🥰😍😍💕😘']	2021-07-19	05:18:23	2021-07-19T05:18:23Z	0	0
90	ليش ما يكشفوها كلها بعدين يغطونها	Why do they not reveal it all, then they cover it	2021-07-19	05:04:36	2021-07-19T05:04:36Z	0	0
91	الله أوما لا تدر ابنتي الغالية فرداً و انت خير الوارثين لجميع اسيدات التين يريدون أن يرزقهم الله ادرية الصالحة الله أو ما امين يارب العالمين و الصلاة والسلام على رسول الله صلى الله عليه وسلم الله ايشوف من حالنا جميعا امين يارب العالمين 😭😭😭🙏🙏🙏🤲🤲🤲🤲🤲🤲🤲🤲🤲🤲🤲🤲	May God not leave my precious daughter alone, and you are the best ... 😭😭😭🙏🙏🙏🤲🤲🤲🤲🤲🤲🤲🤲🤲🤲🤲🤲🤲🤲🤲🤲🤲🤲🤲🤲🤲🤲🤲🤲	2021-07-19	03:58:39	2021-07-19T03:58:39Z	0	0
92	قال صلى الله عليه وسلم (خيرُ الدُّعاءِ دعاءُ يومِ عرفةَ وخيرُ ما قلتُ أنا والنبيُّون مِن قَبلي لا إلهَ إلَّا اللهُ وحدَه لا شريكَ له له الملكُ له الحمدُ وهو على كلِّ شيءٍ قديرٌ)	He, may God’s prayers and peace be upon him, said: “The best of supplication is a prayer on the day of Arafah, and the best of what I and the Prophets said before me. There is no god but Allah alone.	2021-07-19	03:50:23	2021-07-19T03:50:23Z	0	0
93	أعوذ بالله من الشيطان الرجيم ( وَلَتَجِدَنَّهُمْ أَحْرَصَ النَّاسِ عَلَىٰ حَيَاةٍ وَمِنَ الَّذِينَ أَشْرَكُوا ۚ يَوَدُّ أَحَدُهُمْ لَوْ يُعَمَّرُ أَلْفَ سَنَةٍ وَمَا هُوَ بِمُزَحْزِحِهِ مِنَ الْعَذَابِ أَن يُعَمَّرَ ۗ وَاللَّهُ بَصِيرٌ بِمَا يَعْمَلُونَ )	I seek refuge with Allah from the accursed Satan (Thou wilt indeed find them, of all people, most greedy of life,-even more than the idolaters: Each one of them wishes He could be given a life of a thousand years: But the grant of such life will not save him from (due) punishment. For Allah sees well all that they do).	2021-07-19	03:35:53	2021-07-19T03:35:53Z	0	0
94	"We are Not going to tell you good by!!!...We love you ❤, and We will always love you and visits you❤...I Swear,.. I'M very sad and almost cry over this awaited witness".......أُحِلَّ لَكُمْ صَيْدُ الْبَحْرِ وَطَعَامُهُ مَتَاعًا لَّكُمْ وَلِلسَّيَّارَةِ ۖ وَحُرِّمَ عَلَيْكُمْ صَيْدُ الْبَرِّ مَا دُمْتُمْ حُرُمًا ۗ وَاتَّقُوا اللَّهَ الَّذِي إِلَيْهِ تُحْشَرُونَ (96) ۞ جَعَلَ اللَّهُ الْكَعْبَةَ ا…	"We are not Going to Tell You Good By !!! ... We love you ❤, and we will always love you and visits you ... I swre, .. I very sad and almost cry Over this AwiedDed witness".......أُحِلَّ لَكُمْ صَيْدُ الْبَحْرِ وَطَعَامُهُ مَتَاعًا لَّكُمْ وَلِلسَّيَّارَةِ ۖ وَحُرِّمَ عَلَيْكُمْ صَيْدُ الْبَرِّ مَا دُمْتُمْ حُرُمًا ۗ وَاتَّقُوا اللَّهَ الَّذِي إِلَيْهِ تُحْشَرُونَ (96) ۞ جَعَلَ اللَّهُ الْكَعْبَة…	2021-07-19	03:26:35	2021-07-19T03:43:29Z	1	0
95	💜🧡💙💚💖💜🧡💙💚💖💜🧡💙💚💖	['💜🧡💙💚💖💜🧡💙💚💖💜🧡💙💚💖']	2021-07-19	03:25:28	2021-07-19T03:25:28Z	0	0
96	Assalam ALAIKUM Subhan ALLAH 🕋 LABBAIK ALLAH HUMMA LABBAIK 🕋	Assalam Alaikum Subhan Allah 🕋 Labbaik Allah Humma Labbaik 🕋	2021-07-19	03:09:46	2021-07-19T03:09:46Z	0	0
97	لا إله إلا الله وحده لاشريك لهله الملك وله الحمدوهو على كل شي قدير.(أفضل مايقال يوم عرفه)	There is no god but Allah alone, there is no partner for the king, and praise be to him for everything.	2021-07-19	02:49:52	2021-07-19T02:49:52Z	0	0
98	حرمت الشعوب العربية والإسلامية من اداء فريضة الحج	The Arab and Islamic peoples were deprived of performing the Hajj pilgrimage	2021-07-19	02:20:45	2021-07-19T02:20:45Z	0	0
99	Mâchallah 🤍	['Mâchallah 🤍']	2021-07-19	02:13:23	2021-07-19T02:13:23Z	0	0
100	‏عن النبي ﷺ أنه قال: خير الدعاء دعاء يوم عرفة، وخير ما قلت أنا والنبيون من قبلي: لا إله إلا الله وحده لا شريك له، له الملك وله الحمد وهو على كل شيء قدير	On the authority of the Prophet ﷺ that he said: The best of supplication is a prayer on the day of Arafah, and the best of what I and the Prophets said before me: There is no god but God alone who has no partner, he has the king and he has praise and he is capable of everything	2021-07-19	02:03:47	2021-07-19T02:03:47Z	0	0
101	لا إله إلا لله وحده لا شريك له له الملك وله الحمد وهو على كل شئ قدير	There is no god but Allah, alone, without partner, to Him belongs the kingdom and to Him be praise, and He has power over all things	2021-07-19	01:59:25	2021-07-19T01:59:25Z	0	0
102	Subhanallah Masha Allah	Subhanallah Masha Alllah	2021-07-19	01:30:01	2021-07-19T01:30:01Z	0	0
103	-ادعولي دَعوة مِنْ قَلبكُم،في يوم عـرفة لعلّ أحدكم أقربُ مِني إلى الله فَ "تُستجاب"‏ولكم بالمثل 🙏❤.	Pray for me a supplication from your heart on the Day of Arafa, perhaps one of you is closer to God, so he will be “responded” and the same for you 🙏❤.	2021-07-19	01:29:01	2021-07-19T01:29:01Z	0	0
104	Assalamu Alaikum Wa Rahmatullahi Wa barakatuhu mera naam Mohammed Azhar Mere Liye duaon ki Khaas to rupaye jarurat hai	Assalamu Alaikum wa rahmatullahi wa barakatuhu mera mooMed azhar mere Liye Duaon Ki Khas to RuPaye Jarurat Hai	2021-07-19	01:28:42	2021-07-19T01:28:42Z	0	0
105	بسم الله الرحمن الرحيم ماشاء الله تبارك الرحمن الرحيماللهم عمره وحجه قريباً	In the name of God, the Most Gracious, the Most Merciful. Oh God, Umrah and Hajj soon	2021-07-19	01:28:13	2021-07-19T01:28:13Z	1	0
106	أوه لا	Oh no	2021-07-19	01:20:24	2021-07-19T01:20:24Z	0	0
107	اللهم ارحمنا برحمتك	Oh God, have mercy on us with your mercy	2021-07-19	01:04:36	2021-07-19T01:04:36Z	1	0
108	جمال الكعبة يضاهي جمااال الدنيا كلها 😓يارب ارزقني زيارتها عن قريب 🤲🏻	The beauty of the Kaaba is comparable to the whole world.😓 Lord, grant me to visit it soon 🤲🏻	2021-07-19	01:00:41	2021-07-19T01:00:41Z	1	0
109	استغفرالله العظيم الذي لاإله الاهو الحي القيوم وأتوب اليهاستغفرالله العظيم واتوب اليهاستغفرالله استغفرالله استغفرالله	I seek forgiveness from Allah Almighty, besides whom there is no God, the Living, the Sustainer, and I repent to him	2021-07-19	00:54:15	2021-07-19T00:54:15Z	0	0
110	لااله الاالله وحده لاشريك له له الملك وله الحمد وهو على كل شي قدير	There is no god but Allah alone, Who has no partner, to Him belongs the sovereignty, to Him belongs the praise, and He is Omnipotent over all things	2021-07-19	00:53:09	2021-07-19T00:53:09Z	0	0
111	الله أكبر الله أكبر الله أكبر لااله الااللهالله أكبر الله أكبر ولله الحمدالله أكبر كبيرا والحمدلله كثيرا وسبحان الله بكرة وأصيلا	God is great, God is great, God is great, there is no god but God, God is great, God is great, praise be to God	2021-07-19	00:52:27	2021-07-19T00:52:27Z	0	0
112	ماشاء الله الله يعز السعوديه ويحفظ خادم الحرمين وولي عهده	May God bless Saudi Arabia and preserve the Custodian of the Two Holy Mosques and his Crown Prince	2021-07-19	00:50:34	2021-07-19T00:50:34Z	1	0
113	اللَّهُمَّ صَلِّ وَسَلِّمْ وَبَارِگ ؏ نبينا םבםבﷺ♥️	Oh God, blessings and peace and blessings be upon our prophet Muhammad ﷺ♥️	2021-07-19	00:25:45	2021-07-19T00:25:45Z	0	0
114	" ‏اللهُم أغْسل قلوبنا من أوجاعها ؛ وأرزقُنا من فيض كرمك سعادةً لا تنْقطع ، وأشرح صدورنا ويسر امورنا اللهم صبّحنا صباحاً تنشرح فيه الصدور، وتقبل فيه التوبة، وتتسع فيه الأرزاق، ياخير من سُئل وأكرم من أعطى يا حيّ يا قيّوم .- صَباحُ الخّير 💭☀️.	O Allah, wash our hearts from their aches, and grant us from the abundance of your generosity uninterrupted happiness, and explain our chests and ease our affairs. ☀️.	2021-07-19	00:25:31	2021-07-19T00:25:31Z	1	0
115	*ضجوا بأصواتكم الى السماء* .. *كبّروا وهلّلوا واحمدوا الله كثيراً**‏فنحن في أحب الأيام واعظمها عند الله* ♡‏*اللّٰہ أڪبَر اللّٰہ أڪبَر اللّٰہ أڪبَر* ‏ *لاَ إلہ إلاّ اللّٰہ*‏*اللّٰہ أڪبَر اللّٰہ أڪبَر وللّٰہ الحمّد*	* Raise your voices to the sky *.. * Say God is the greatest and rejoice and praise God a lot ** We are in the most beloved days and the greatest with God * ♡ * God is great God is great God is great God is great * * There is no god but Allah* * God is great God is great *	2021-07-19	00:25:18	2021-07-19T00:25:18Z	1	0
116	مسى الكراسي ياورد قاعد على الكراسي	Evening of chairs, roses, sit on the chairs	2021-07-19	00:15:16	2021-07-19T00:16:41Z	0	0
117	الله اكبر كبيرا والحمد لله كثيرا بسم الله ماشاء مظهر مهيب يااخد القلب اللهم لاتحرمنا من نعمك وفضلك علينا الله اكبر ماشاء الله ياولاد السعوديه ربنا يبارك جهودكم وشرف الكعبه والمسجد الحرام ويجزيكم الف خير عن المسلمين اللهم اروقنا حجه وزياره بيتك الحرام	God is great, and thank God so much. In the name of God, what a majestic sight, take heart. Oh God, do not deprive us of your grace and grace upon us. Allah is the greatest. God bless the people of Saudi Arabia. May God bless your efforts, honor the Kaaba and the Grand Mosque, and may God reward you a thousand good on behalf of Muslims. May God help me to perform Hajj and visit the Sacred House.	2021-07-19	00:12:59	2021-07-19T00:12:59Z	0	0
118	اللهُمَّ زِد هذا البيت تعظيماً وتشريفاً واجزِ كل القائمين على خدمة بيتك الحرام خير الجزاء 🤲🏻	Oh God, increase this house with glory and honor, and the forbidden part of all those who serve your house.	2021-07-19	00:11:35	2021-07-19T00:11:35Z	6	0
119	Amin	['Amin']	2021-07-19	00:04:24	2021-07-19T00:04:24Z	0	0
120	اللهم ارزقنا حجة أو عمرة	Oh God, grant us Hajj or Umrah	2021-07-19	00:01:11	2021-07-19T00:01:11Z	2	0
121	Ya Allah Almighty please give me success in my CSS Exam this year,Amen.	Ya allah almighty please give me succase in my css exam this year, Ameen.	2021-07-20	08:33:19	2021-07-20T08:33:19Z	1	0
122	assalamwallekum mashallah subhanallah ammmmmin	Assalamwallekum Mashallah Subhanlalah Ammmmin	2021-07-20	04:22:15	2021-07-20T04:22:15Z	1	0
123	نحن جميعًا خطاة ونقصّر في مجد الله - كيف نخلص - هذا هو إنجيل الخلاص	All of us have sinned and fallen short of God's glory- this is the gospel of salvation	2021-07-20	04:11:28	2021-07-20T04:11:28Z	0	0
124	نحن جميعًا خطاة ونقصّر في مجد الله - كيف نخلص - هذا هو إنجيل الخلاص	All of us have sinned and fallen short of God's glory - this is the gospel of salvation	2021-07-20	04:11:20	2021-07-20T04:11:20Z	0	0
125	🕋🥺	['🕋🥺']	2021-07-20	02:05:47	2021-07-20T02:05:47Z	0	0
126	ماشاءالله	Mashallah	2021-07-20	02:05:38	2021-07-20T02:05:38Z	0	0
127	قالت لي الجدة أن أغادر	Grandma told me to leave	2021-07-20	00:57:07	2021-07-20T00:57:07Z	0	0
128	لا سمح الله عمتي تأتي إلى دكا	God forbid my aunt comes to Dhaka	2021-07-20	00:56:52	2021-07-20T00:56:52Z	0	0
129	خبر الجدة أن تغادر	Tell Grandma to leave	2021-07-20	00:56:39	2021-07-20T00:56:39Z	0	0
130	لا سمح الله أن تترك الجدة جون منزل المالك تمامًا	God forbid Grandma John left the whole owner's house	2021-07-20	00:56:27	2021-07-20T00:56:27Z	0	0

## Sheet: Al-Arabiya Channel
Comment ID	Text Comments-Arabic	Text Comments -English	Date	Time	Uptated At	LikeCount	Total Reply Count
1	صار سنتين متخلون أحد يلزمهة على شنو نغيريهة قابل أشتكتلكم	It's been two years without anyone being able to Yelzma, why change is needed, I miss you.	2021-07-18	23:38:09	2021-07-18T23:38:09Z	0	0
2	والله شي غريب أن يتم حملها من غير شباب وأبناء السعوديه المفروض أن هذي الامور تتم من خلال اقل شي عرب والله اني مستغرب	By God, it is strange that it is carried without the youth and sons of Saudi Arabia.	2021-07-18	23:36:31	2021-07-18T23:36:31Z	0	12
3	سبحان الله ا	Glory be to God	2021-07-18	23:36:14	2021-07-18T23:36:14Z	2	0
4	نفسي أكون واحد من الحمالين 😢😢	I would like to be one of the porters 😢😢	2021-07-18	23:30:02	2021-07-18T23:30:02Z	8	4
5	اللهم زد هذا البيت تعظيما وتشريفا شكرا لكم انتم من تستاهلون التاج حفظ الله الأمن والبلاد🇸🇦	Oh God, increase this house, greatness and honor. Thank you	2021-07-18	23:26:19	2021-07-18T23:26:19Z	39	5
6	ما شاء الله	God willing	2021-07-18	23:26:06	2021-07-18T23:26:06Z	4	0
7	يارب اكرمني اني إذور بيت الله الحرام قبر الرسول صلى الله عليه وسلم	Oh God, bless me to visit Sacred House and the grave of the prophet peace be upon him	2021-07-18	23:25:26	2021-07-18T23:25:26Z	22	2
8	اللهم صل على محمد وآل محمد وآل محمد وآل محمد وآل محمد وآل	O Allah, bless Muhammad and the family of Muhammad	2021-07-18	22:43:08	2021-07-18T22:43:08Z	5	0
9	توحشنا تشوفوا الحجاج من كل فج عميق	We miss seeing pilgrims from every deep ravine	2021-07-18	22:33:52	2021-07-18T22:33:52Z	5	2
10	تم	Done	2021-07-18	22:26:57	2021-07-18T22:26:57Z	0	0
11	اللهم صلِّ وسلم وزد وبارك على سيدنا ونبينا وحبيبنا ( محمد 🌺) وعلى آله وصحبه الطيبين الطاهرين 🌷 اللهم ارزقنا زيارة الكعبة 🕋 اللهم امين تحياتي واعتزازي بكم	O Allah, blessings and peace and blessings be upon our prophet, our Prophet and our beloved (Muhammad 🌺) and his family and his good friends, pure, 🌷 O God, grant us the visit of the Kaaba 🕋 Oh God, Amen, my regards and my pride	2021-07-18	22:18:30	2021-07-18T22:18:30Z	2	0
12	ليش انتوا شسويتوا فرغتوا الكعبه	Why did you want to empty the Kaaba?	2021-07-18	22:08:57	2021-07-18T22:08:57Z	0	5
13	سبحان الله العظيم …. العقل	Glory be to God the Great .... Mind	2021-07-18	21:48:53	2021-07-18T21:48:53Z	0	3
14	يا رب يوم تبدل حياتي انا واولادي الى الاحسن يا ربي	Lord, change my life and the lives of my children for the better	2021-07-18	21:47:26	2021-07-18T21:47:26Z	11	2
15	جميل	Nice	2021-07-18	21:19:25	2021-07-18T21:19:25Z	2	0
16	مواعيدنا يا رب بزياره الكعبه يا رب	O Lord,help us to visit the Kaaba, O Lord	2021-07-18	21:12:20	2021-07-18T21:12:20Z	2	0
17	اللهم احفظ خادم الحرمين الملك سلمان وولي عهده الامين الامير محمد بن سلمان والشعب السعودي فعلا خدام الحرمين الشريفين بالفعل	Oh God, protect the Custodian of the Two Holy Mosques, King Salman and his Crown Prince, Prince Muhammad bin Salman, and the Saudi people are really the servants of the Two Holy Mosques, already	2021-07-18	21:08:07	2021-07-18T21:08:07Z	3	0
18	الله يبارك هنيئا لكم هذا الشرف،أسأل الله أن لايحرمنا من زيارتها	May God bless you. Congratulations on this honor. I ask God not to deprive me of visiting it	2021-07-18	20:24:40	2021-07-18T20:24:40Z	43	2
19	ارجوكم ادعوا لاخي محمد فهو تعبان جدا من كورونا ادعوله بالشفاء ياجماعه ويرجع لاولاده وبناته وبيته ويطمن قلب امه عليه ولايك عشان الكل يشوف 🤲🏼💐❤️جزاكم الله خير ورحم والديكم وعافاكم ورزقكم	Please pray to my brother Muhammad, because he is very tired of Corona. Pray for him to recover.	2021-07-18	20:12:37	2021-07-18T20:12:37Z	1	2
20	كل سنه في حج يغيرو كسوه	Every year in Hajj, they change the Kiswa	2021-07-18	20:12:01	2021-07-18T20:12:01Z	0	0
21	تبارك الله 🌹❤️🌹	Blessed be God 🌹❤️🌹	2021-07-18	19:53:00	2021-07-18T19:53:00Z	4	0
22	السلام عليكم اخواني اخواتي انا اختكم ام دياب ساكنه بل شمال السوري عندي ٤ اولاد ايتام بحاجه للمساعده من الله ثم من اهل الخير ساكنه انا ولادي بخيمه ماعندي غير رحمت الله والله يجزاكم الخير يا اهل الخير والله العظيم حق اكل ماعندي انا ولادي اليتامه مالي معين قير الله عندي ٤ اولاد يتامه باركين بخيمه مشخشقه يا اهل الخير ملا شان الله. ساعدوني لوحه الله تعاله يلي بده يساعدني يخلي رقم الهاتف الله يجزاكم ال…	Peace be upon you, my brothers and sisters. I am your sister, Umm Diab, who lives in northern Syria. I have 4 orphaned children who need help from God, then from good people. I live in a tent. I have 4 orphaned children...	2021-07-18	19:49:04	2021-07-18T19:49:04Z	0	0
23	يارب ارزقني حج بيتك الحرام وعمرة موفقه وسكن صغير قريب يالله ادعوا لي ياجماعه عن ظهر الغيب وقولوا امين يارب العالمين جزاكم الله خيرا	Lord, grant me a pilgrimage to Your Sacred House, a successful Umrah, and a small residence nearby.	2021-07-18	19:44:44	2021-07-18T19:44:44Z	168	47
24	ماشاء الله	God bless	2021-07-18	19:40:18	2021-07-18T19:40:18Z	12	1
25	سبحان الله	How great is our God	2021-07-18	19:40:11	2021-07-18T19:40:11Z	10	1
26	اللهم صل وسلم وبارك على سيدنا وحبيبنا محمد وعلى آله وصحبه وسلم تسليما كثيرا	O Allah, bless and bless our master and our beloved Muhammad and his family and companions	2021-07-18	19:39:41	2021-07-18T19:39:41Z	10	0
27	نحن نذهب لاخوتنا الفقراء والمهمشين فى منازلهم لنقدم لهم المساعده ولكى يصل صوتهم 🗣️🗣️🗣️ إلى جميع الناس	We go to our poor and marginalized brothers in their homes and offer them assistance so that their voice reaches 🗣️🗣️🗣️ to all people	2021-07-18	19:38:27	2021-07-18T19:38:27Z	6	0
28	كسوة بملايين الدولارات؟ ؟!!!!	Millions of dollars? ? !!!!	2021-07-18	19:37:53	2021-07-18T19:37:53Z	0	0
29	ماشاء الله بسم الله	God willing, in the name of God	2021-07-18	19:36:12	2021-07-18T19:36:12Z	7	0
30	ما شاء الله تبارك الله حفظ الله السعودية الحبيبة وال سعود اخوان نورة	God willing, may God bless the beloved Saudi Arabia and Saud, brothers of Noura	2021-07-18	19:36:08	2021-07-18T19:36:08Z	17	15
31	ماشاءاللہ	God willing	2021-07-18	19:33:55	2021-07-18T19:33:55Z	3	0
32	ليش الله محتاج .دهب وفضة وحرير ..لو العبد محتاج رحمة الله عليه.	Why, does God need gold, silver, and silk. Or the servant needs God's mercy on him.	2021-07-18	19:33:42	2021-07-18T19:33:42Z	2	29
33	"استعِدَّ لـيوم عرفة من الآن ؛ اسأل الله أن يرزقك القبول وحلاوة الدعاء فيه والتوفيق لصيامه ، انتظر قدوم هذا اليوم العظيم بشَغَف وحُب ، ألِحَّ على الله ، اجعله يوماً فاصلاً في حياتك للأفضل ، استبشر بكرَم الله لك ، ادع الله ثم انتظر إجابته بحُسْن ظنٍّ وصِدق يقين ."🕋🕋🕋🕋🕋🕋🕋🕋	Prepare for Arafat Day from now on. I ask God to please you with acceptance and the sweetness of supplication in him and success in his fasting. surely...🕋🕋🕋🕋🕋🕋🕋🕋	2021-07-18	19:31:23	2021-07-18T19:31:23Z	59	5
34	"استعِدَّ لـيوم عرفة من الآن ؛ اسأل الله أن يرزقك القبول وحلاوة الدعاء فيه والتوفيق لصيامه ، انتظر قدوم هذا اليوم العظيم بشَغَف وحُب ، ألِحَّ على الله ، اجعله يوماً فاصلاً في حياتك للأفضل ، استبشر بكرَم الله لك ، ادع الله ثم انتظر إجابته بحُسْن ظنٍّ وصِدق يقين ."،	Prepare for Arafat Day from now on. I ask God to please you with acceptance and the sweetness of supplication in him and success in his fasting. surely..	2021-07-18	19:30:58	2021-07-18T19:30:58Z	13	3
35	يارب ميحرمش اي حد من لمس ثوب وكسوة الكعبة المشرفة قولو يارب	Oh God, do not deprive anyone of touching the Kaaba and the Kiswa	2021-07-19	23:35:48	2021-07-19T23:35:48Z	1	2
36	بسم الله ماشاء اللهكل عام والامه الإسلامية بألف خيرأعاد الله العيد عليكم وعلينا بالخير واليمن والبركات	In the name of God, God willing, may God bless you and the Islamic nation with a thousand good, may God return this Eid to you and us with goodness and blessings.	2021-07-19	23:18:19	2021-07-19T23:18:19Z	1	0
37	شو التكبر . جايبين هنود يشلون كسوة الكعبة المشرفة. حملها شرف	What is the magnification? The Indians carry the covering of the Kaaba. Honor the porters	2021-07-19	22:49:13	2021-07-19T22:49:13Z	0	0
38	اللهم ارزقنا بزيارتها يا رب	Oh God, grant us visit it, O Lord	2021-07-19	22:48:58	2021-07-19T22:48:58Z	2	0
39	قال الله تعالى :﷽ 🍀ولله الأسماء الحسنى فادعوه بها 🍀 من أسماء و صفات الله في القرآن :الله الرحمان الرحيم الحي القيوم الأحد الصمد الواحد القهار الأول الآخر الظاهر الباطن العزيز الحكيم الرزاق القدير المولى النصير الحميد المجيد الأكرم الأعلى الولي الوكيل الخبير الشكور القوي القادر الواسع الفتاح الوهاب الغني الكريم الملك القدوس السلام المؤمن المهيمن العزيز الجبار المتكبر الخالق البارئ المصور الخلاق ال…	God Almighty said: ﷽ ﷽ God has the most beautiful names, so call him them 🍀 From the names and attributes of God in the Qur’an: God, the Most Merciful, …	2021-07-19	22:36:31	2021-07-19T22:36:31Z	0	0
40	السلام عليكم لاصحاب الباقات ومش بتعرف تتفرج علي فيديوهات طبخ طويله يشرفونا ما يميزنا الفيديوهات القصيره والوصفات والخطوات مكتوبه لاخذ اسكرين شوت والاحتفاظ بالوصفه كل ده وفي دقائق معدوده 💐🌼	Peace be upon you for the owners of the packages and you do not know that you watch on long cooking videos.	2021-07-19	22:28:03	2021-07-19T22:28:03Z	2	0
41	اللهم طهر الكعبه	Oh God, purify the Kaaba	2021-07-19	22:26:44	2021-07-19T22:26:44Z	0	0
42	ماشاء الله تبارك الرحمن. كل عام وانتم بخير جزاك الله خيرا	Mashae Allah tabarak Allah. Happy New Year, may God reward you	2021-07-19	22:26:09	2021-07-19T22:26:09Z	1	0
43	حسبنا الله ونعم الوكيل	Allah is Sufficient for us! Most Excellent is He in Whom we trust!	2021-07-19	22:19:39	2021-07-19T22:19:39Z	0	0
44	ماذا قال عمر بن الخطاب	What did Omar bin Al -Khattab say	2021-07-19	22:19:38	2021-07-19T22:19:38Z	0	1
45	نعمة ، نعمة🤲🤲🕋🕋👍👍🥰💖🌹🌹🌹🌹💖	Blessing, blessing🤲🤲🕋🕋👍👍🥰💖🌹🌹🌹🌹💖	2021-07-19	22:08:06	2021-07-19T22:08:06Z	0	0
46	الله اكبر ربي بارك على كسوة لاطهر ارض في عالم يارب يكتب ليا نحج هناك	To God the Greatest, Lord, bless the clothing of the purest land of the world, Lord, write me a pilgrimage there	2021-07-19	22:06:32	2021-07-19T22:07:19Z	1	0
47	ماشاء الله	God willing	2021-07-19	22:02:43	2021-07-19T22:02:43Z	0	0
48	الاطفال بحاجة للواء والغذاء والعلم يا مسلمين …،	Children need the brigade, food and teaching, Muslims ...,	2021-07-19	21:53:42	2021-07-19T21:53:42Z	2	2
49	مضى من عمري ٣٥ سنه ولسى مازرت بيت الله الحرام ياباطل ياللأسف الله يكتب لي الخطوة وازور بيت الله الحرام	I have passed 35 years of my age, and I did not visit the Sacred House of God…	2021-07-19	21:23:08	2021-07-19T21:23:08Z	3	2
50	مشاءالله جزاكم الله خير	God willing, May Allah reward you well	2021-07-19	21:21:09	2021-07-19T21:21:09Z	0	0
51	لو كان الامر بيدي لقدمت الكسوة القد يمة الى الفقراء	If it were up to me, I would give the old clothing to the poor	2021-07-19	21:06:40	2021-07-19T21:06:40Z	1	2
52	اللهم احفظ بلاد السعوديه وحكامها وشعبها وعلماءها	Oh God, save the Saudi Arabia, its rulers, its people and its scholars	2021-07-19	21:03:40	2021-07-19T21:03:40Z	0	0
53	حرمنا من فريضة الحج .	We were denied the pilgrimage.	2021-07-19	20:59:19	2021-07-19T20:59:19Z	0	0
54	ما شاء الله شرف لكل من ساهم في حياكة و تطريز و حمل الكسوة الشريفة 💖❤️😍رب ارزقني الحج و العمرة مرات متتاليةو رد إلى مكة المكرمة ملايين الحجيج التي تعودنا رؤيتها يا رب 🙏🙏	God willing, an honor for everyone who contributed to sewing, embroidery and carrying the honorable cladding 💖❤️😍 Rabb, the pilgrimage and Umrah are in a row and a response to Makkah, millions of pilgrims that we are used to seeing, O Lord 🙏🙏	2021-07-19	20:45:56	2021-07-19T20:45:56Z	0	0
55	رب عز الاسلام والمسلمين و انصرنا	Lord, Glory Islam and Muslims and give us victory	2021-07-19	20:43:22	2021-07-19T20:43:22Z	1	0
56	لا حج	No Hajj	2021-07-19	20:32:30	2021-07-19T20:32:30Z	0	0
57	❤🕋❤🤲❤❤🕋	❤🕋❤❤❤🕋	2021-07-19	20:16:19	2021-07-19T20:16:19Z	0	0
58	الله	Allah	2021-07-19	20:14:59	2021-07-19T20:14:59Z	1	0
59	تلبسوا الكعبه ابملاين	Wearing the Kaaba by millions	2021-07-19	19:25:06	2021-07-19T19:25:06Z	0	0
60	السماء مفتوحه للاستجابه أنصحكم بقراة هذا الدعاءياودودياودودياودودياذا العرش المجيديافعال لما تريدلك الحمد ولك الشكر على جميع النعماللهم لك الحمدكماينبغي لجلال وجهك وعظيم سلطانكاللهم ياحي ياقيوم صل على محمد وعلى آل محمد كما صليت على ابراهيم وعلى ال ابرهيم انك حميد مجيديارب يارب يارباسألك بعزك الذي لا يراموبملكك الذي لا يضاموبنوركالذي ملأ اركان عرشكيامغيث اغثني ..يامغيث اغثني..يامغيث اغثني..(ثم اذك…	The sky is open to respond to you, I advise you to this supplication, ….	2021-07-19	19:17:25	2021-07-19T19:17:25Z	0	0
61	‏-لعلها تشفّع لي ولك:❤_﴿ وَاذْكُر ربّكَ إِذَا نَسِيت ﴾🕊. - سُبحان الله 🕊. - الحمدلله🕊. - الله أكبّر🕊. - أستغفر الله🕊. - لا اله الا الله🕊. - لاحول ولا قوة الا بالله🕊. - سُبحان الله وبحمده🕊. - سُبحان الله العظيم🕊.- لا اله الا انت سُبحانك ربي أني گنت من الظالمين🕊.- حسبي الله لا اله الا هو عليه توگلت وهو رب العرش العظيمّ🕊.- اللهّم صل وسلم على نبينا محمد وآل محمد 🕊. ‏" ᷂الله أكبر، ᷂الله أكبر، ᷂الله أك…	-Perhaps it is intercession for me and you: ❤_﴿ and remember your Lord if you forget ﴾🕊. Glory be to God 🕊. - Praise be to God. - God is greater. I ask forgiveness from God. - There is no god but God. There is no power but God. Glory be to God and praise. - Glory be to God Almighty. “God is great, God is great, God is great, God is only God, God is great, God is great Praise be to God, God is gre…	2021-07-19	19:17:04	2021-07-19T19:17:04Z	0	0
62	ههههههههه كسوات العيد	Hahahahahahahahahahahahahahahahahahahahahahahahahahahahahahahahahahahahahahahahahahahahahahahahahahahahahahahahahahahahahahahahahahahahahahahahahahahahahahahahahahahahahahahahahahahahaha Eid clothes	2021-07-19	18:50:45	2021-07-19T18:50:45Z	1	0
63	"رَبَّنَا آتِنَا فِي الدُّنْيَا حَسَنَةً وَفِي الآخِرَةِ حَسَنَةً وَقِنَا عَذَابَ النَّارِ"[البقرة 201]	‘O Allaah our Lord give us goodness in this world and goodness in the Hereafter and save us from the punishment of The Fire.’	2021-07-19	17:25:42	2021-07-19T17:25:42Z	28	0
64	الكعبه ليست بحاجه للكسوه الغاليه	The Kaaba does not need a precious clothing	2021-07-19	16:31:17	2021-07-19T16:31:17Z	0	0
65	لا حجاج ولا معتمرين يكسون الكعبه	Neither pilgrims nor pilgrims clothing the Kaaba	2021-07-19	16:30:23	2021-07-19T16:30:23Z	0	0
66	من وين با يجي كورونا وليس هناك حجاج سوى بعدد الاصابع	Where does Corona come from and there are no pilgrims except by the number of fingers	2021-07-19	16:05:56	2021-07-19T16:05:56Z	0	0
67	وزعوا الصدقه على الفقراء	Distribute alms to the poor	2021-07-19	15:01:42	2021-07-19T15:01:42Z	0	0
68	120كيلوغرام ذهب و120 كيلوغرام فضة والحرير	120 kilograms of gold and 120 kilograms of silver and silk	2021-07-19	14:54:09	2021-07-19T14:54:09Z	0	0
69	اجعلتم سقاية الحاج و عمارة المسجد الحرام كمن امن بالله و اليوم الاخر و جاهد في سبيل الله	Does watering the pilgrims and building the Sacred Mosque like one who believes in God and the Last Day and strives in the way of God	2021-07-19	14:53:48	2021-07-19T14:53:48Z	0	0
70	ليش تتزااحموون	Why are you crowding?	2021-07-19	14:35:00	2021-07-19T14:35:00Z	0	0
71	عيدكم مبارك على الجميع لا الاه الا الله محمد رسول الله صلى الله عليه وسلم	Your Eid blessed to everyone, there is no god but God, Muhammad is the Messenger of God, may God bless him and grant him peace	2021-07-19	14:21:42	2021-07-19T14:21:42Z	1	0
72	قل جزاك الله خيرا:❤❤لا اله إلا الله وحده لا شريك له الملك وله الحمد يحيي و يميت بيده الخير وهو على كل شيء قدير❤❤	Say, may God reward you with good:❤❤ …	2021-07-19	14:10:58	2021-07-19T14:10:58Z	1	0
73	قال الله تعالى :﷽ 🍀ولله الأسماء الحسنى فادعوه بها 🍀 من أسماء و صفات الله في القرآن :الله الرحمان الرحيم الحي القيوم الأحد الصمد الواحد القهار الأول الآخر الظاهر الباطن العزيز الحكيم الرزاق القدير المولى النصير الحميد المجيد الأكرم الأعلى الولي الوكيل الخبير الشكور القوي القادر الواسع الفتاح الوهاب الغني الكريم الملك القدوس السلام المؤمن المهيمن العزيز الجبار المتكبر الخالق البارئ المصور الخلاق ال…	God Almighty said: ﷽ 🍀و God is the most beautiful names, so call him them 🍀 From the names and attributes of God in the Qur’an: God, the Most Merciful, …	2021-07-19	14:07:19	2021-07-19T14:07:19Z	0	2
74	مين معترض على الكسوة	Who is objecting to the Kiswa	2021-07-19	14:07:14	2021-07-19T14:07:14Z	2	4
75	بس سؤال الكسوة القديمه ايش بعملو فيها ؟؟ وعيد اضحى مبارك على الامه الاسلاميه	Just a question about the old cladding, what do you do with it? And Eid Al-Adha Mubarak to the Islamic nation	2021-07-19	14:05:56	2021-07-19T14:05:56Z	2	0
76	يارب ارزقني انا وامي الحج والعمرة يارب العالمين وجميع امة محمد صلي الله عليه و سلم ادعولي عن ظهر الغيب	Oh Lord, grant me my mother, the Hajj and Umrah, Lord of the worlds, and all the nation of Muhammad, may God bless him and grant him peace, pray for me	2021-07-19	14:04:18	2021-07-19T14:04:18Z	1	0
77	لماذا الكعبة مزينة بالذهب والفضة والحرير	Why the Kaaba is decorated with gold, silver and silk	2021-07-19	13:55:40	2021-07-19T13:55:40Z	0	0
78	ماشاء الله ياربي العظيم و الله أكبر و الحمد لله ياربي العظيم و الله أكبر	God bless my Lord, the Great, God is great, and praise be to God, Lord, the Great, and God is great	2021-07-19	13:55:32	2021-07-19T13:55:32Z	1	0
79	امين ان شاء الله تجي عندنا وتحج	Amen, God willing, you will come to us and perform Hajj	2021-07-19	13:51:24	2021-07-19T13:51:24Z	0	0
80	شو فائدة كسوة الكعبه	What is the benefit of the Kaaba clothing	2021-07-19	13:50:50	2021-07-19T13:50:50Z	0	0
81	الله اكبر الله اكبر الله اكبر لا إله إلا اللهالله اكبر الله اكبر الله اكبر ولله الحمد	God is great, God is great, God is great, there is no god but God, God is great, God is great, and praise be to God	2021-07-19	13:50:10	2021-07-19T13:50:10Z	2	0
82	اللهم صل على محمد وال محمد	O Allah, bless Muhammad and his family	2021-07-19	13:47:00	2021-07-19T13:47:00Z	3	1
83	ليه ثوب الكعبة عم تحطو فيه الذهب والفضة والحرير	Why do you wear the Kaaba in gold, silver and silk	2021-07-19	13:46:03	2021-07-19T13:46:03Z	0	0
84	ياااارب ارزقني العمره والحج🤲🤲🤲🤲	Oh Lord, grant me the Umrah and Hajj	2021-07-19	13:45:07	2021-07-19T13:45:07Z	1	0
85	الحج فارغ، بسبب فيروس صغير الله يرفع عنا،الوباء	Hajj is empty because of a small virus, may God remove the epidemic	2021-07-19	13:39:32	2021-07-19T13:39:55Z	0	0
86	قناة العربية قناة غبيه جداً	Al Arabiya channel is a very stupid channel	2021-07-19	13:37:53	2021-07-19T13:37:53Z	1	0
87	الكسوه ليست مهمه أحسنوا نياتكم يرحمكم الله	Kassawa is not important. Good intentions, may God have mercy on you	2021-07-19	13:18:26	2021-07-19T13:18:26Z	1	1
88	يارب ارزقني عمرة مع أبي و أمي عاجلا غير آجلا يارب...	Oh Lord, grant me Umrah with my father and my mother sooner, not later, Lord ...	2021-07-19	13:18:11	2021-07-19T13:18:11Z	1	0
89	غير مبرر	Unjustified	2021-07-19	13:17:25	2021-07-19T13:17:25Z	1	0
90	كورونا لغت الحج	Corona canceled Hajj	2021-07-19	13:09:04	2021-07-19T13:09:04Z	3	3
91	متى نرا مكة مزدحمة بالحجاج	When do we see Mecca crowded with pilgrims	2021-07-19	13:09:01	2021-07-19T13:09:01Z	0	2
92	ماشاءالله🇮🇶💕	Masha'Allah🇮🇶💕	2021-07-19	13:01:39	2021-07-19T13:01:39Z	5	0
93	الله اكبر الله اكبر لبيك الله مالبيك لبيك لا شريك لك لبيك ان الحمد ونعمة لك ولملك لا شريك لك لبيك	God is great, God is great for you, may God bless you.	2021-07-19	12:51:20	2021-07-19T12:52:16Z	1	0
94	الكسوة قطعة قماش لا تغني و لا تنفع	The covering is a piece of cloth that does not sing and does not benefit	2021-07-19	12:47:14	2021-07-19T12:47:14Z	2	5
95	ماشاء الله اللهم عز السعوديه	God bless the glory of Saudi Arabia	2021-07-19	12:39:15	2021-07-19T12:39:15Z	4	0
96	ماشاء الله تبارك الرحمن يارب تطعمني حج بيتك الحرام والطواف بعرفه	May God bless you, Lord, grant me a pilgrimage to your Sacred house	2021-07-19	12:33:42	2021-07-19T12:33:42Z	1	0
97	ما هذا العيد	What is this holiday	2021-07-19	12:27:31	2021-07-19T12:27:31Z	0	0
98	الكذاب ربنا يوديه فين ؟	The liar, where God lead him?	2021-07-19	12:25:58	2021-07-19T12:25:58Z	0	0
99	اللهم صل على محمد وآل محمد اللهم اكتب لناحج بيتك الحرام أمين يارب العالمين	O Allah, bless Muhammad and the family of Muhammed, O Allah, grant us to perform Hajj to your Sacred house.	2021-07-19	12:25:34	2021-07-19T12:25:34Z	4	0
100	اللهم ارزقني زيارة الكعبة عاجلا غير اجلا	Oh God, grant me to visit the Kaaba sooner rather than later	2021-07-19	12:24:04	2021-07-19T12:24:04Z	1	0
101	حـفـظ الله الـسـعـوديـة الـعـظـمـى وكافة بلاد المسلمين 🇸🇦💚💚	May Allah save KSA and all Muslim countries 🇸🇦💚💚	2021-07-19	12:11:30	2021-07-19T12:11:30Z	6	2
102	شنو فائدة الكسوة	What is the benefit of the cladding?	2021-07-19	12:07:36	2021-07-19T12:07:36Z	0	1
103	الله اكبر الله اكبر الله اكبر لا اله الا الله الله اكبر الله اكبر الله اكبر ولله الحمد	God is great, God is great, God is great, there is no god but God, God is great, God is great, and praise be to God	2021-07-19	11:56:24	2021-07-19T11:56:24Z	1	0
104	كسوة الكعبة المشرفة تكلف ملايين نشكر السعودية على هذه الجهود الجبارة	The Kaaba cost millions thanks to the Kingdom of Saudi Arabia for these gigantic efforts	2021-07-19	11:53:29	2021-07-19T11:53:29Z	2	1
105	لا اله الا الله وحده لا شريك له له الملك وله الحمد وهو على كل شيء قدير	There is no god but Allah alone who has no partner, and he has praise, and he is capable of everything	2021-07-19	11:38:27	2021-07-19T11:38:27Z	1	1
106	لبيك اللهم لبيك لبيك لا شريك لك لبيك	I respond to Your call O Allah! I respond to Your call. You have no partner. I respond to Your call.	2021-07-19	11:00:24	2021-07-19T11:00:24Z	1	0
107	يقول الله تعالى: (يخادعون الله والذين آمنوا وما يخدعون إلا أنفسهم وما يشعرون في قلوبهم مرض فزادهم الله مرضا ولهم عذاب أليم بما كانوا يكذبون )	God Almighty says: (There is sickness in their hearts, and Allah ˹only˺ lets their sickness increase. They will suffer a painful punishment for their lies.)	2021-07-19	10:54:49	2021-07-19T10:54:49Z	3	1
108	اين الحجاج	Where are the pilgrims?	2021-07-19	10:49:39	2021-07-19T10:49:39Z	0	0
109	ما شاء الله الحمد لله	God willing, praise be to God	2021-07-19	10:43:07	2021-07-19T10:43:07Z	0	0
110	كل عام ٦٧٠ ك حرير	Each year 670 k silk	2021-07-19	10:41:44	2021-07-19T10:41:44Z	0	7
111	120 كغ من الذهب و120 كغ من الفضة 630كغ من الحرير	120 kg of gold and 120 kg of silver 630 kg of silk	2021-07-19	10:32:19	2021-07-19T10:32:19Z	0	0
112	،اللهم ارزقني الحج ياررب ياكيرم انا واهلي وكل مسلم ارزقنا الحج. يارب والتوبه النصوحه	Oh God, grant me Hajj, Lord, my family, my family, and every Muslim, give us the Hajj. Lord, Sincere repentance	2021-07-19	10:18:05	2021-07-19T10:18:05Z	2	0
113	لا الاه الا الله محمد رسول الله الله واكبر الله واكبر ولله الحمد	There is no god but Allah, Muhammad is the Messenger of God, Allah is great, Allah is Great, and the praise to Allah	2021-07-19	10:17:28	2021-07-19T10:17:28Z	1	0
114	تبارك الرحمان.	Blessed be Rahman.	2021-07-19	10:17:00	2021-07-19T10:17:00Z	2	0
115	الحرير فضه سبحان الله	Silk silver, Glory be to God	2021-07-19	10:07:21	2021-07-19T10:07:21Z	1	0
116	الله يحفظ بلاد الحرمين الشريفين ويحفظ الملك سلمان بن عبدالعزيز آل سعود	May God preserve the country of the Two Holy Mosques and preserve King Salman bin Abdulaziz Al Saud	2021-07-19	10:06:39	2021-07-19T10:06:39Z	4	0
117	اللهم اغفرلي	God forgive me	2021-07-19	10:03:03	2021-07-19T10:03:03Z	1	0
118	اللهم اغفرلي	God forgive me	2021-07-19	10:02:55	2021-07-19T10:02:55Z	1	0
119	لبيك اللهم لبيك، لبيك لا شريك لك لبيك، ان الحمد والنعمة لك والملك لا شريك لك 🙏	I respond to Your call O Allah! I respond to Your call. You have no partner. I respond to Your call. All praise, thanks and blessings are for You. 🙏	2021-07-19	10:02:14	2021-07-19T10:02:14Z	1	0
120	اللهم ارزقنا حج بيتك الحرام	Oh God, grant us the pilgrimage of your Sacred house	2021-07-19	09:56:04	2021-07-19T09:56:04Z	4	1
121	كورونا السبب	Corona is the reason	2021-07-19	09:39:44	2021-07-19T09:39:44Z	0	11
122	منع شعائر الله بسبب إنتشار كورونا	Preventing the rituals of God due to the spread of Corona	2021-07-19	09:35:32	2021-07-19T09:35:32Z	0	6
123	اللهم احفظ كعبتك	Oh God, save your Kabaa	2021-07-19	09:35:05	2021-07-19T09:35:46Z	7	2
124	سبحان من لة الدوام كان شرف عظيم وخروج مهيب من مصر الي السعودية في مشهد تدمع لة العيون وهو خروج المحمل او زفة المحمل	vAlmighty! It was a great honor and a solemn departure from Egypt to Saudi Arabia, in a scene that weeps in the eyes, and the exit of the pregnant woman's wedding, which is The exit of the cladding holder or the zaffa of the cladding holder	2021-07-19	09:32:22	2021-07-19T09:32:22Z	0	1
125	ا شاء الله ربي ارزقني حج بيتك ألهم آمين يا رب العالمين والصلاة والسلام على سيدنا وحبيبنا محمد.	God bless. My Lord, make me a pilgrimage to your house, O God, Amen, O Lord of the worlds. And prayers and peace be upon our master and beloved Muhammad.	2021-07-19	09:29:22	2021-07-19T09:29:22Z	0	0
126	يجب الاهتمام أكثر بنقل مراسم التشريفات	More attention must be taken to transfer the ceremonies	2021-07-19	09:27:33	2021-07-19T09:27:33Z	2	1
127	نريد نحج	We want a pilgrimage	2021-07-19	09:24:25	2021-07-19T09:24:25Z	0	0
128	كسوة لبناء حجري بقيمة 3ملون دولار	a stone building cladding worth 3 million dollars	2021-07-19	09:22:09	2021-07-19T09:22:09Z	0	2
129	ماشاءالله تبارك الله	God bless	2021-07-19	09:16:22	2021-07-19T09:16:22Z	2	0
130	عاشت ايدكم تجنن💖طيب والكسوة القديمة وين حتروح؟	good job. so beautiful 💖, Where is the old cloth placed?	2021-07-19	09:11:01	2021-07-19T09:11:01Z	0	1
131	يارب ينتهي الوباء وازور الكعبة وبيتك الحرام يارب ياكريم	Oh Lord, the epidemic ends and visits the Kaaba and your Sacred house	2021-07-19	08:24:21	2021-07-19T08:24:21Z	2	0
132	آللهم اجعلنا من زوار الكعبه	Oh God, make us visitors to the Kaaba	2021-07-19	08:21:41	2021-07-19T08:21:41Z	1	0
133	ليش كل هذا الأسراف	Why all this extravagance	2021-07-19	08:21:40	2021-07-19T08:21:40Z	0	0
134	لا اله الا الله	No God except Allah	2021-07-19	08:16:31	2021-07-19T08:16:31Z	1	0
135	الله يتقبل من حجاج بيت الله الحرام وتحفظ السعوديه حكومه وشعب	May God accept the pilgrims of the Sacred House of God and protect Saudi Arabia, government and people	2021-07-19	08:12:00	2021-07-19T08:12:00Z	10	3
136	يالله يالله يالله يالله يالله يالله	Oh God, O God, O God, O God	2021-07-19	08:06:12	2021-07-19T08:06:12Z	1	0
137	اللهم اجعلني من ضيوفك سنه القادمه	Oh God, make me from your guests next year	2021-07-19	08:05:20	2021-07-19T08:05:20Z	5	0
138	الله يبارك هنيئا لكم هذا الشرف،أسأل الله أن لايحرمنا من زيارتها	May God bless you with this honor. I ask God that it does not deprive us of its visit	2021-07-19	08:04:25	2021-07-19T08:04:25Z	0	1
139	اللهم صل على محمد وآل محمد	O Allah, bless Muhammad and his	2021-07-19	07:59:48	2021-07-19T07:59:48Z	1	0
140	اللهم عودة للكعبة والطواف بالكعبة	Oh God, bring us back to the Kaaba and the circumambulation of the Kaaba	2021-07-19	07:59:28	2021-07-19T07:59:28Z	0	1
141	فين الاهتمام بحمل كسوة الكعبة	Where is the interest in carrying the Kaaba clothing	2021-07-19	07:55:56	2021-07-19T07:55:56Z	0	2
142	اللهم ارزقني حجه، ياكريم اكرمني بزيار البيت الحرام ،إن شاء الله🤲	Oh God, grant me pilgramage, honor me by visiting the Sacred House, God willing	2021-07-19	07:43:35	2021-07-19T07:43:35Z	1	0
143	لبيك اللهم لبيك لبيك لا شريكه لك لبيك	I respond to Your call O Allah! I respond to Your call. You have no partner.	2021-07-19	07:12:04	2021-07-19T07:12:04Z	4	0
144	اللهم صلي على محمد وال محمد	The blessings of God to Muhammad and his family	2021-07-19	07:11:36	2021-07-19T07:11:36Z	3	0
145	اللهم استرنا في الدنيا والآخرة	May Allah protect us in this world and the hereafter	2021-07-19	06:39:38	2021-07-19T06:39:38Z	1	0
146	اللهم ارزقنا زيارة بيتك الحرام والمسجد الأقصى أنا وكل من قال امين 🤲🤲	Oh God, grant us the visit of your Sacred house and the Al -Aqsa Mosque, I and everyone who said Amin 🤲🤲	2021-07-19	06:39:00	2021-07-19T06:39:00Z	0	1
147	لبيك اللهم لبيك، لبيك لا شريك لك لبيك، إن الحمد والنعمة لك والملك، لا شريك لك	I respond to Your call O Allah! I respond to Your call. You have no partner. I respond to Your call. All praise, thanks and blessings are for You	2021-07-19	06:33:06	2021-07-19T06:33:06Z	1	0
148	الله يكون في عون السعوديه لو عملت قاله شوفو كيف ولو ما عملت قالو شوف كيف ما عملت هههههه	God bless Saudi Arabia. If they do, they will say: See how. And if they don't, they'll say: Look how they did it hahahahaha	2021-07-19	06:24:01	2021-07-19T06:24:01Z	2	2
149	اللهم بارك لنا في هذا العيد ورحمنا	Oh God, bless us on this holiday and have mercy on us	2021-07-19	06:21:25	2021-07-19T06:21:25Z	14	1
150	صلى الله عليه وسلم	Peace be upon him	2021-07-19	06:17:46	2021-07-19T06:17:46Z	1	0
151	اثر هذا الوباء. وكم من عجائز مسلمين بدون اماوى. وعاجزين عن العمل.	The effect of this epidemic. And how many Muslims homeless. And unable to work.	2021-07-19	06:14:28	2021-07-19T06:14:28Z	0	0
152	يا من تقرأ تعليق ادعولي لكي أزور البيت و اصلي فيه وازورة الحرمين الشريفين و لكم بالمثل ان شاء الله	Whoever reads a comment, pray for me to visit the house and pray in it and visit the Two Holy Mosques, and you will likewise, God willing	2021-07-19	05:56:17	2021-07-20T05:20:52Z	26	8
153	يارب يارب اشفني من المرظ ياالله	Oh God, heal me from the disease, O God	2021-07-19	05:36:14	2021-07-19T05:36:14Z	1	0
154	كل من شاف تعليقي يصلي على النبي محمد صلى الله عليه وسلم 🌹 اللهم صل وسلم على سيدنا ونبينا محمد 🌹 ❤️	Everyone who see my comment, pray on the Prophet Muhammad, may God bless him and grant him peace 🌹 God bless our master and our Prophet Muhammad 🌹 ❤️	2021-07-19	05:35:17	2021-07-19T05:35:17Z	1	0
155	ليش الكسوة	Why is the cladding?	2021-07-19	05:26:42	2021-07-19T05:26:42Z	0	11
156	اللهم صلي على سيدنا محمد. اللهم ياربي ارزقني زيارة الكعبة المشرفة	The blessings of God to the Prophet Muhammad. Oh God, my Lord, grant me a visit to the honorable Kaaba	2021-07-19	05:22:27	2021-07-19T05:22:27Z	1	0
157	لبيك اللهم لبيك لبيك لاشريك لك لبيك لك لحمد لاالله الله اللهم لاتحرمنه من زياره بيتك 🤲	I respond to Your call O Allah! I respond to Your call. You have no partner. No God except Allah, Oh God, do not deprive us of visiting your house 🤲	2021-07-19	05:19:56	2021-07-19T05:19:56Z	4	1
158	❤️	['❤️']	2021-07-19	05:18:53	2021-07-19T05:18:53Z	1	0
159	اجمل منظر شايفه في حياتي 😍	The most beautiful view of my life 😍	2021-07-19	05:14:52	2021-07-19T05:14:52Z	1	0
160	كسوة عبادالله التي هي المبتغى	The clothing of God's servants is the desired	2021-07-19	05:07:58	2021-07-19T05:08:29Z	1	4
161	ما شاء الله تبارك الرحمن	God willing, God blessing	2021-07-19	05:03:42	2021-07-19T05:03:42Z	1	0
162	تبارك الرحمن ❤️	Blessed be the Most Gracious ❤️	2021-07-19	04:55:54	2021-07-19T04:55:54Z	1	0
163	اللهم صلى على سيدنا محمد وعلى آله وصحبه وسلم	Blessings of God to the prophet Muhammad and his family and him	2021-07-19	04:48:33	2021-07-19T04:48:33Z	1	0
164	يارب اكتب لنا حج بيتك الحرام يارب العالمين تفرجها عليه	Oh Lord, grant us the pilgrimage of your Sacred house, Lord of the worlds.	2021-07-19	04:47:16	2021-07-19T04:47:16Z	15	0
165	الكعبه بحاجه ان تعيدو.لها زوارها	The Kaaba needs to return its visitors	2021-07-19	04:20:59	2021-07-19T04:20:59Z	0	1
166	Allah akbar	['Allah akbar']	2021-07-19	04:20:44	2021-07-19T04:20:44Z	0	0
167	اللهم احفظ بلدي العراق	Oh God, save my country Iraq	2021-07-19	04:20:05	2021-07-19T04:20:05Z	3	0
168	اللهم عجل لوليك الفرج	Oh God, please fasten relief for us	2021-07-19	04:14:35	2021-07-19T04:14:35Z	1	0
169	كله كلام فاضي	It's all empty talk	2021-07-19	03:58:04	2021-07-19T03:58:04Z	1	5
170	شعور جميل لا يوصف	Nice feeling is indescribable	2021-07-19	03:57:01	2021-07-19T03:57:01Z	2	0
171	ماشاء الله اللهم صلِّ وسلم وبارك على سيدنا محمد وعلى آله وصحبه أجمعين	God bless and bless our master Muhammad and his family and companions as a whole	2021-07-19	03:56:37	2021-07-19T03:56:37Z	2	0
172	ديسلايك إلا 16 هههههه	Dislaik only 16 Hahaha	2021-07-19	03:56:35	2021-07-19T03:56:35Z	0	1
173	اللهم صلي وسلم وبارك على سيدنا محمد وال محمد اللهم اجعلنا من حجاج بيت الله الحرام	Oh God, peace and blessings be upon our master Muhammad and Muhammad	2021-07-19	03:55:04	2021-07-19T03:55:04Z	1	0
174	يرب ارزقني زيارة بيتك الحرام أمين أمين أمين أمين أمين أمين أمين أمين أمين أمين أمين أمين أمين أمين أمين أمين أمين أمين أمين أمين أمين أمين أمين أمين أمين أمين أمين يرب يرب يرب يرب يرب يرب يرب يرب يرب يرب يرب يرب يرب يرب يرب يرب يرب يرب يرب يرب يرب يرب يرب يرب يرب يرب يرب يرب يرب يرب يرب يرب يرب يرب يرب يرب يرب يرب يرب يرب يرب يرب يرب يرب يرب يرب يرب يرب يرب يرب يرب يرب يرب يرب يرب يرب يرب يرب يرب…	God, give me a visit to your Sacred home, Amin Amin Amin Amin Amin Amin Amin Amin Amin Amin Amin Amin Amin Amin Amin Amin Amin Amin Amin Amin Amin Yarb Yarb Yarb Yarb Yarb Yarb Yarb Yarb Yarb Yarb Yarb Yarb Yarb Yarb Rabb heep is a jerb, the Lord of the Lord, the Lord, the Lord, the Lord, the Lord, the Lord, the Lord, the Lord, the Lord, the Lord, the Lord, the Lord, the Lord, the Lord, the Lord,…	2021-07-19	03:48:31	2021-07-19T03:48:31Z	0	0
175	يقارب طهر بينكي	O Lord, purify your house	2021-07-19	03:41:08	2021-07-19T03:41:08Z	1	4
176	الا أرى داعي	Don't I see a reason	2021-07-19	03:39:50	2021-07-19T03:39:50Z	7	6
177	شني السنه اكو دول ماكو جاوبو	Why are there countries that did not come	2021-07-19	03:29:36	2021-07-19T03:29:36Z	0	0
178	{لَّيْسَ ٱلْبِرَّ أَن تُوَلُّواْ وُجُوهَكُمْ قِبَلَ ٱلْمَشْرِقِ وَٱلْمَغْرِبِ وَلَٰكِنَّ ٱلْبِرَّ مَنْ ءَامَنَ بِٱللَّهِ وَٱلْيَوْمِ ٱلْءَاخِرِ وَٱلْمَلَٰٓئِكَةِ وَٱلْكِتَٰبِ وَٱلنَّبِيِّۦنَ وَءَاتَى ٱلْمَالَ عَلَىٰ حُبِّهِۦ ذَوِى ٱلْقُرْبَىٰ وَٱلْيَتَٰمَىٰ وَٱلْمَسَٰكِينَ وَٱبْنَ ٱلسَّبِيلِ وَٱلسَّآئِلِينَ وَفِى ٱلرِّقَابِ وَأَقَامَ ٱلصَّلَوٰةَ وَءَاتَى ٱلزَّكَوٰةَ وَٱلْمُوفُونَ بِعَهْدِهِمْ إِ…	Allah Almighty says in the holy Quran in surat Al-Baqara(verse 177) "Righteousness is not that you turn your faces toward the east or the west, but [true] righteousness is [in] one who believes in Allah, the Last Day, the angels, the Book, and the prophets and gives wealth, in spite of love for it, to relatives, orphans, the needy, the traveler, those who ask [for help], and for freeing slaves; […	2021-07-19	03:24:45	2021-07-19T03:24:45Z	0	4
179	يجب الاتفاق مع مصنع مميز بتصنيعها ويتم تغييرها كل ما احتاج إلى ذلك وليس كل سنة	It must be agreed with a distinguished factory in its manufacture and it is changed everything that he needed, not every year	2021-07-19	03:23:18	2021-07-19T03:23:18Z	2	4
180	اللهم ارزقنا حج بيتك الحرام	Oh God, grant us the pilgrimage of your Sacred house	2021-07-19	02:41:43	2021-07-19T02:41:43Z	3	3
181	يارب يرجع الحجيج الي ملىء مكة لنشعر أن مازال هناك شيىء يجمع المسلمين ما اجمل كثرتهم في مكة وصوت التكبيرات وكم كانت تقهر أعداء الاسلام لرؤية الحجيج باعداد كبير حب وطاعة وعشق لهذا المكان ملبين لشعائر الله عز وجل	Oh God, return the pilgrims to the fullness of Mecca so that we feel that there is still something that unites the Muslims. How beautiful they are in Mecca and the sound of the takbeer and how much the enemies of Islam are immersed in seeing the pilgrims with great preparation, love, obedience and love for this place.	2021-07-19	02:30:32	2021-07-19T02:30:32Z	83	10
182	السلام عليكم اخواني اخواتي الله يجزيكم الخير ادعولي بذريه الصالحة صارلي ٨سنوات 😭😭😭	Peace be upon you, my brothers, my sisters, may God reward you with good.Pray for me with good offspring I am at 8 years 😭😭😭	2021-07-19	02:17:50	2021-07-19T02:17:50Z	6	4
183	استغفر الله الذي لا اله الا هو الحي القيوم واتوب اليه	I seek the forgiveness of Allah, there is no true god except Allah, the Ever-Living, the Self- Subsisting, and I turn to Him in repentance	2021-07-19	01:21:56	2021-07-19T01:21:56Z	3	1
184	ماشاء الله أكرمنا بزيارة الكعبة المشرفة وبيتك الحرام وقبر حبيبك المختار وبلمس الكعبة الشريفة وأمي وكل محبينا يارب العالمين 🤲🏽	God blessing, Oh God, grant us to visit the honorable Kaaba, your Sacred house, the grave of your chosen lover, and touch the honorable Kaaba, with my mother, and all our loved ones, Lord of the worlds.	2021-07-19	01:16:32	2021-07-19T01:16:32Z	13	5
185	مضغوطين	compressed	2021-07-19	01:14:58	2021-07-19T01:14:58Z	5	10
186	اللهم صل وسلم على سيدنا محمد صلى الله عليه و سلم	O Allah, bless our master Muhammad, may God bless him and grant him peace	2021-07-19	01:08:05	2021-07-19T01:09:09Z	4	0
187	بارك الله فيكم ماشاء الله	God bless you, God willing	2021-07-19	01:06:45	2021-07-19T01:06:45Z	1	0
188	المذيع مرتبك او بردان	The announcer is confused or cold	2021-07-19	01:05:58	2021-07-19T01:05:58Z	1	2
189	رائع،كل عام وكل المسلمين في جميع بقاع الارض بخيروصحةوسعادة🤲💖	Wonderful, every year and all Muslims in all parts of the earth are fine and happy	2021-07-19	00:58:36	2021-07-19T00:58:36Z	37	4
190	رغم مواجع بلدي بس.. كـل عـام والأمة العربية والاسلامية بخيـر 💚🌿	Despite my country's pain, but.. Every year and the Arab and Islamic nation is fine 💚🌿	2021-07-19	00:49:13	2021-07-19T00:49:13Z	30	13
191	ألله واكبر الحمد ألله	God and the greatest praise be to God	2021-07-19	00:47:37	2021-07-19T00:47:37Z	0	0
192	سبحان. الله. كانت. تخرج. من مصر فىً محمل. على الجمال الى ارض الحرمين.	To God be glory. Allah. It used to go out of Egypt in something called the "Mahmal" on camels to the land of the Two Holy Mosques.	2021-07-19	00:23:56	2021-07-19T00:23:56Z	1	2
193	احس بلامس رأيت تغيير كسوة الكعبة	I feel like yesterday I saw a change in the clothes of the Kaaba	2021-07-19	00:21:21	2021-07-19T00:21:21Z	0	1
194	نشاألله يرزقنازيارة بيت ألله	God willing, We ask God to help us visit the Sacred House	2021-07-19	00:18:55	2021-07-19T00:18:55Z	4	1
195	جزاكم ألله كل خير	May Allah reward you all the best	2021-07-19	00:17:50	2021-07-19T00:17:50Z	2	0
196	ماشاألله ماشاألله ماشاألله ماشاألله ماشاألله ❤❤❤❤❤❤❤ تبارك ألرحمان لاقوة ألاباألله	God willing God willing God willing God willing God willing ❤❤❤❤❤❤❤ Blessed be the merciful, there is no power but with God	2021-07-19	00:17:30	2021-07-19T00:17:30Z	5	0
197	اللهم صل وسلم وبارك على سيدنا وحبيبنا ونبينا محمد صلى الله عليه وسلم	O Allah, bless and grant peace and blessings upon our master and our beloved and Prophet Muhammad, may God bless him and grant him peace	2021-07-20	23:38:32	2021-07-20T23:38:32Z	0	0
198	اتمنا من الله العلي العضيم ان يرزقني لادا الحج انا والوالده ربي يحفضه الامنيه الذي احلم بها يا رب	I ask God Almighty to help me to perform Hajj, my mother and I, may God protect her. The wish that I dream of, O Lord	2021-07-20	22:09:16	2021-07-20T22:09:16Z	0	0
199	أنتم أكثر ناس منافقين	You are the most hypocritical people	2021-07-20	21:52:58	2021-07-20T21:52:58Z	0	0
200	من يحملو الكسوه ؟	Who carries the kiswah?	2021-07-20	21:51:58	2021-07-20T21:51:58Z	0	0
201	مشاءالله يارب أرزقني الحج والعمرة يارب العالمين	Masha Allah, Lord, grant me Hajj and Umrah, Lord of the worlds	2021-07-20	20:01:16	2021-07-20T20:01:16Z	0	0
202	الحمد لله هذا من فضل ربياللهم وفق ولاة امورنا الى كل ما فيه الخير للبلاد والعباد.	This is by the grace of my Lord. Oh God, according to the governors of our affairs for the good of the homeland and the people.	2021-07-20	19:25:52	2021-07-20T19:25:52Z	0	0
203	هههههههههه	Hahaha	2021-07-20	19:09:34	2021-07-20T19:09:34Z	0	0
204	قناة العربية المنافقة	Al -Arabiya hypocritical channel	2021-07-20	18:37:39	2021-07-20T18:37:39Z	0	0
205	آآه يا ريتني بيناتكن وشيلها قبلانة ينكسر ظهري فدا الكعبة ولباسها	I wish I was among them and carry it until my back breaks. I am the redemption of the Kaaba and its clothes	2021-07-20	18:35:37	2021-07-20T18:35:37Z	0	0
206	اللهم لا تحرمنا من زيارتها و نضر اليها و تشبع منها يا رب العالمين اللهم صلي و سلم علي سيدنا محمد عليه صلاة و سلام	Oh God, do not deprive us of its visit and seeing and saturation with it.O Lord of the worlds, may God bless and grant peace to our master Muhammad, peace and blessings be upon him	2021-07-20	18:34:35	2021-07-20T18:34:35Z	0	0
207	الكعبة تحتاج لحجاج يعبدون الله ويحسنون معاملة الناس	The Kaaba needs pilgrims who worship God and improve people's treatment	2021-07-20	18:31:00	2021-07-20T18:31:00Z	1	0
208	ماشاءالله 🕋🌿	Mashallah 🕋🌿	2021-07-20	18:27:09	2021-07-20T18:27:09Z	1	0
209	اللهم صلي على سيدنا محمد ❤️	O Allah, bless our master Muhammad ❤️	2021-07-20	18:14:31	2021-07-20T18:14:31Z	0	0
210	بارك الله فيكم وكل من شارك في عظمة وتعظيم كسوة الكعبة المشرفةالله	God bless you and everyone who participated in the greatness and glorification	2021-07-20	17:46:40	2021-07-20T17:52:22Z	0	0
211	هدم الكعبة أهون عند الله من إراقة دم مسلم	The demolition of the Kaaba is easier for God than the bloodshed of Muslim blood	2021-07-20	17:33:02	2021-07-20T17:33:02Z	0	0
212	اللهم ارزقني زيارةحرم الرسول الشريف محمدصل الله عليه وسلم يارب. حجا وعمرة اطعمناولاتحرمنا	Oh God, grant me a visit to the Holy Prophet, may God bless him and grant him peace, Lord. Hajj and Umrah, I will fed us	2021-07-20	17:30:33	2021-07-20T17:30:33Z	0	0
213	يارب ارزقني زيارة بيتك المحرم.	Oh Lord, grant me a visit to your forbidden home.	2021-07-20	17:29:38	2021-07-20T17:29:38Z	0	0
214	هل هناك كسوة للكعبه في زمن الرسول؟	Is there a clothing of the Kaaba in the time of the Messenger?	2021-07-20	17:22:11	2021-07-20T17:22:11Z	0	0
215	لما يعبدالمسلمين الكعبة	When Muslims worship the Kaaba	2021-07-20	17:19:16	2021-07-20T17:19:16Z	0	1
216	انا لا افهم نقل كسوة الكعبة لتغير كسوة جديد	I do not understand the transfer of the Kaaba's clothing to change a new clothing	2021-07-20	17:07:59	2021-07-20T17:07:59Z	0	0
217	اللهم ارفع البلاء عن هذه الامه واحفظ مقدساتنا وبلغنا الوقوف على عرفه امييييييييييين ياربالعالميين لكل مشتاق	Oh God, raise the calamity from this nation and save our sanctities, and we reached the standing of the customs of the world, Lord of the worlds.	2021-07-20	16:39:03	2021-07-20T16:39:03Z	1	0
218	قناة غير مسؤولة	Non -responsible channel	2021-07-20	16:29:49	2021-07-20T16:29:49Z	0	0
219	قناة سيئة	Bad channel	2021-07-20	16:29:32	2021-07-20T16:29:32Z	0	0
220	EID MUBARAK....	EID MUBARAK ....	2021-07-20	16:16:20	2021-07-20T16:16:20Z	0	0
221	اللهم انصر الإسلام	Oh God, grant victory to Islam	2021-07-20	15:44:50	2021-07-20T15:44:50Z	0	0
222	اللهم ٱرفع عنا الوباء والبلاء وٱرزقنا الحج والعمرة عاجلا غير آجل يا رب العالمين	Oh God, lift the epidemic and calamity from us, and grant us Hajj and Umrah sooner, not later, O Lord of the worlds	2021-07-20	15:36:41	2021-07-20T15:36:41Z	0	0
223	يارب توعدنا بزيارة مكة المكرمة	Oh Lord, we promised to visit Makkah Al -Mukarramah	2021-07-20	15:11:42	2021-07-20T15:11:42Z	0	0
224	منع الحج للمسلمين	Prevent Hajj for Muslims	2021-07-20	14:10:50	2021-07-20T14:10:50Z	0	1
225	هل هذا عمل جيد	Is this a good job?	2021-07-20	14:09:01	2021-07-20T14:09:01Z	0	0
226	اللهم اني اسالك حج بيتك الحرام في هذا العام وفي كل عام والله اني فاتمنى أن احج يوما 😓😓😓😓	Oh God, I ask you for the pilgrimage of your Sacred house this year and every year, by God, I hope that I will perform Hajj one day 😓😓😓😓	2021-07-20	13:27:06	2021-07-20T13:27:06Z	0	0
227	كسوة عيد	Eid clothing	2021-07-20	13:17:04	2021-07-20T13:17:04Z	0	0
228	❤❤❤❤	['❤❤❤❤']	2021-07-20	13:15:48	2021-07-20T13:15:48Z	0	0
229	كسوة الكعبة	Kaaba clothing	2021-07-20	13:12:34	2021-07-20T13:12:34Z	0	1
230	﴿أَجَعَلتُم سِقايَةَ الحاجِّ وَعِمارَةَ المَسجِدِ الحَرامِ كَمَن آمَنَ بِاللَّهِ وَاليَومِ الآخِرِ وَجاهَدَ في سَبيلِ اللَّهِ لا يَستَوونَ عِندَ اللَّهِ وَاللَّهُ لا يَهدِي القَومَ الظّالِمينَ﴾ [التوبة: ١٩]	Does watering the pilgrims and building the Sacred Mosque like one who believes in God and the Last Day and strives in the way of God	2021-07-20	13:11:23	2021-07-20T13:11:23Z	0	0
231	استغفر الله العظيم واعوذ به من تعليق السفهاء كيف أصدق أنه عاقل	I ask forgiveness from God Almighty and seek refuge in Him from the comment of the fools. How do I believe that he is sane	2021-07-20	13:01:11	2021-07-20T13:01:11Z	2	0
232	لا اريد الحج أليها	I do not want to perform Hajj to it	2021-07-20	12:17:58	2021-07-20T12:17:58Z	1	0
233	يارب اغفرلي يارب ااعالمين شكرا بتوفيق نتمي ربي يرزقني الحج بيت الله	Oh Lord, forgive my Lord, thank you. Thank you, with success. I hope to make a pilgrimage to the Holy House	2021-07-20	12:11:55	2021-07-20T12:11:55Z	0	0
234	الله يبارك روعة مشاء الله	God bless. Wonderful. Masha Allah	2021-07-20	12:10:56	2021-07-20T12:10:56Z	0	0
235	اللهم ارزقنا حج بيتك الحرام في اقرب وقت اللهم ارفع عنا الوباء عاجل غير اجل	Oh God, grant us the pilgrimage of your Sacred house as soon as possible	2021-07-20	12:10:33	2021-07-20T12:10:33Z	1	0
236	مش كانت بتروح من مصر	was it come from Egypt	2021-07-20	12:04:00	2021-07-20T12:04:00Z	0	0
237	ياااارب ارزقني حج بيتك الحراميااارب اشفه ابنتي تعاني من ضمور في الدماغ عمرها 4سنوات ادعولي ياجماعه دعوه 40مستجابه جزاكم الله خيرورزقكم الذريه الصالحه	Oh Lord, grant me the pilgrimage of your Sacred house. May God heal my 4-year-old daughter who suffers from brain atroph. Pray, O people, an answered prayer, may Allah reward you with good, and grant you good offspring	2021-07-20	11:59:17	2021-07-20T11:59:17Z	0	0
238	يارب ارزقني حج بيتك الحرام	Oh Lord, grant me the pilgrimage of your Sacred house	2021-07-20	11:53:40	2021-07-20T11:53:40Z	0	0
239	تكاليف باهظة	Excessive costs	2021-07-20	11:51:19	2021-07-20T11:51:19Z	0	1
240	اللهم زِد هذا البيت تعظيما وتشريفا 😍🤍	Oh God, increase this house in great and honorable 😍🤍	2021-07-20	11:48:50	2021-07-20T11:48:50Z	0	0
241	ما الفائدة	What interest	2021-07-20	11:43:21	2021-07-20T11:43:21Z	0	0
242	السعوديه بس هي الي تحج 😡	Only Saudi Arabia is the one who performs Hajj 😡	2021-07-20	11:43:19	2021-07-20T11:43:19Z	0	7
243	ربنا ظلمنا أنفسنا وإن لم تغفر لنا وترحمنا لنكن من الخاسرين	Our Lord has wronged us, and if you do not forgive us and have mercy on us, we will be among the losers	2021-07-20	11:39:44	2021-07-20T11:39:44Z	8	0
244	إفتحوا المساجد	Open mosques	2021-07-20	11:38:11	2021-07-20T11:38:11Z	1	1
245	خلو للكعبة قيمتها ومكانتها	Give the Kaaba its value and prestige	2021-07-20	11:32:49	2021-07-20T11:32:49Z	0	0
246	شو فرق بيننا وبين الهنود	What is the difference between us and the Indians	2021-07-20	11:12:39	2021-07-20T11:12:39Z	0	2
247	حرم الناس من حج بيت الله الحرام	People were deprived of the pilgrimage of the Sacred House of God	2021-07-20	10:44:12	2021-07-20T10:44:12Z	1	0
248	اللهم ارزقنا جميعا حج بيتك الحرام ....امين .	Oh God, grant us all the pilgrimage of your Sacred house .... Amen.	2021-07-20	10:28:51	2021-07-20T10:28:51Z	0	0
249	اللهم صل على محمد وال محمد وعجل فرجهم الشريف 💓♥️♥️	O Allah, bless Muhammad and the family of Muhammad and hasten their honorable joy 💓 ♥ ️ ♥ ️	2021-07-20	10:25:58	2021-07-20T10:25:58Z	0	0
250	اللهم صل على محمد وال محمد وعجل فرجهم الشريف 💓♥️	O Allah, bless Muhammad and the family of Muhammad and hasten their honorable joy 💓 ♥ ️	2021-07-20	10:25:55	2021-07-20T10:25:55Z	1	0
251	اللهم صل على محمد وال محمد وعجل فرجهم الشريف 💓♥️♥️	O Allah, bless Muhammad and the family of Muhammad and hasten their honorable joy 💓 ♥ ️ ♥ ️	2021-07-20	10:25:50	2021-07-20T10:25:50Z	0	0
252	اللهم صل على محمد وال محمد وعجل فرجهم الشريف 💓♥️	O Allah, bless Muhammad and the family of Muhammad and hasten their honorable joy 💓 ♥ ️	2021-07-20	10:25:46	2021-07-20T10:25:46Z	0	0
253	يا ربي نزور بيتك 🤲	Oh my Lord, grant us visiting your house 🤲	2021-07-20	10:25:43	2021-07-20T10:25:43Z	0	0
254	اللهم صل على محمد وال محمد وعجل فرجهم الشريف 💓♥️♥️	O Allah, bless Muhammad and the family of Muhammad and hasten their honorable joy 💓 ♥ ️ ♥ ️	2021-07-20	10:25:41	2021-07-20T10:25:41Z	0	0
255	سبحان الله وبحمده سبحان الله العظيم	Glory be to Allah and His is the praise, (and) Allah, the Greatest is free from imperfection	2021-07-20	09:35:22	2021-07-20T09:35:22Z	0	0
256	ايش الأولى	What is the first?	2021-07-20	09:21:26	2021-07-20T09:21:26Z	0	0
257	اللهم ارزقنا زيارة جح بيتك الحرام ورزقنا حسن الخاتمة	Oh God, grant us the visit of your Sacred house, and give us a good end of life	2021-07-20	09:19:57	2021-07-20T09:19:57Z	0	0
258	انا مليون مرة اكرر ذلك. هذا يوم عيد الله	I am a million times. This is the day of God	2021-07-20	09:19:10	2021-07-20T09:19:10Z	0	0
259	ماذا يفعلون بالكسوة القديمة	What do they do with old clothing?	2021-07-20	09:05:46	2021-07-20T09:05:46Z	0	0
260	عجيب أمر الاعراب	Strange thing about the Arabs	2021-07-20	09:01:23	2021-07-20T09:01:23Z	0	0
261	اللهم إنا نسألك الهداية و السداد.	Oh God, we ask you for guidance and success..	2021-07-20	08:53:52	2021-07-20T08:53:52Z	0	1
262	اللهم صل وسلم على نبينا محمد وعلى آله وصحبه أجمعيناللهم لك الحمد والشكر ياللهاللهم اجعلنا من اهل الجنه يارب العالمين	O Allah, bless our Prophet Muhammad and his family and companions, may God bless you, praise and thanks, O God, make us from the people of Heaven, Lord of the worlds	2021-07-20	08:52:34	2021-07-20T08:52:34Z	0	0
263	اللهم زد بيتك العظيم تشريفا وتعظيما ومهابتا ورفعتا وبرا	O Allah, add this House with glory, greatness, majesty, goodness,	2021-07-20	08:34:49	2021-07-20T08:34:49Z	1	0
264	كسوة الكعبة من الذهب والفضة ، لماذا؟	The Kaaba clothing of gold and silver, why?	2021-07-20	08:28:07	2021-07-20T08:28:07Z	0	0
265	ماذا بعد الكسوة؟	What after the cladding?	2021-07-20	08:23:42	2021-07-20T08:23:42Z	0	7
266	بسم الله ما شاء الله اللهم صل وسلم على نبينا محمد وعلى آله وصحبه وسلم	In the name of God, God willing, peace and blessings be upon our Prophet Muhammad and his family and companions	2021-07-20	08:01:50	2021-07-20T08:01:50Z	0	0
267	ماشاء الله و,الله يبارك ربي أرزقنا زياره الكعبة المشرفة إنشاء الله	God willing, and God bless our Lord, grant us the visit of the Kaaba, God willing	2021-07-20	07:50:36	2021-07-20T07:50:36Z	0	0
268	نؤمن بانه عند الله تجتمع الخصوم	We believe that the opponents will meet	2021-07-20	07:39:38	2021-07-20T11:00:15Z	4	5
269	الحمدلله كثيرا	Praise be to God a lot	2021-07-20	07:33:32	2021-07-20T07:33:32Z	0	0
270	اللهم إجعلنا من الحاجين المعتمرين لبيتك الكريم	O Allah, make us among the performers of Hajj and Umrah to your Noble House	2021-07-20	07:07:56	2021-07-20T07:07:56Z	0	0
271	ما اهم من كسوة الكعبة	What is more important than the clothing of the Kaaba	2021-07-20	06:57:32	2021-07-20T06:57:32Z	0	1
272	نقل كسوة الكعبة ايه ده بيتغير لوحده 😅😅	Transferring the covering of the Kaaba, change by itself 😅😅	2021-07-20	06:53:16	2021-07-20T06:53:16Z	0	0
273	طبيعي ما حد بينصاب لان مكه لا يدخلها وباء	It is natural that no one will be infected because Makkah Al-Mukarramah does not enter into an epidemic	2021-07-20	06:17:53	2021-07-20T06:17:53Z	0	0
274	ظلت كسوه الكعبه تأتي من مصر ٧٠ سنه ..	Kiswa kept coming from Egypt 70 years.	2021-07-20	05:51:52	2021-07-20T05:51:52Z	0	0
275	120 كيلوغرام من الذهب. ويكولون ليش مسوين اضرحتكم من الذهب	120 kilograms of gold. And they say why make their shrines of gold?	2021-07-20	05:12:31	2021-07-20T05:12:31Z	2	4
276	💜 صلى🌹الله🌹على🌹محمد🌹صلى 🌹الله🌹على🌹محمد🌹صلى🌹الله🌹على🌹محمد🌹عدد💙خلقك💙ورضى 💙 نفسه🌹وزنة💚عرشك🌹ومداد💖 كلماتك💝💖💗💓💞💕💟💔🧡💛💚💙💜💘💝💖💗💓💞💕💟💔🧡💛💚💙 💜💘💝💖💗💓💞💕💟💔🧡💛 💚💙 💜💘💝💖💗💓💞💕💟💔🧡💛 💚💙 💜 💘💝💖💗💓💞💕💟💔🧡💛 💚💙 💜💘💝💖💗💓💞💕💟💔🧡💛 💚💙 💜💘💝💖💗💓💞💕💟💔🧡💛 💚💙 💜💘💝💖💗💓💞💕💟💔🧡💛 💚💙 💜	💜 Peace be upon 🌹 God 🌹 upon 🌹 Muhammad 🌹 peace 🌹 God 🌹 upon 🌹 Muhammad 🌹 peace 🌹 God 🌹 upon 🌹 Muhammad 🌹 💚💙💜💘💝💖💗💓💞💕💟💔🧡💛💚💙 💜💘💝💖💗💓💞💕💟💔🧡💛 💞💕💟💔🧡💛 💚💙 💜💘💝💖💗💓💞💕💟💔🧡💛 💜	2021-07-20	04:56:54	2021-07-20T04:56:54Z	1	0
277	💞🏡🌹💞🏡🌹💞🏡🌹💞🏡💞🏡💞🌹سبحان الله🌹 والحمد لله🌹ولا اله الا الله🌹والله اكبر🌹عدد خلقك🌹 ورضى نفسه🌹وزنة عرشك🌹ومداد كلماتك🌹🌹 🇸🇦 🇾🇪 🇦🇪 🏡🌹💞🍀🍁🌲🌳🌴🌾🌿🍀🍁🌻🌼🌺🌻🌼💐🌸🥀🍃🌻🌼💐🌸🌹🥀 🌺💐🌹🌹🌹🌹🌹🌹🌹🌹🌹🌹🌹🌹🌹🌹🌹🌹🌷🌸🌹🌸🌷🌸🌷🌸🌷🌹🌷🌸🌷🌸🌷🌸🌹🌸🌷🌸🌷🌸🌷🌹🌷🌸🌷🌸🌷🌸🌹🌸🌷🌸🌷🌸🌷🌹🌷🌸🌷🌸🌷🌸🌹🌸🌷🌸🌷🌸🌷🌹🌷🌸🌷🌸🌷🌸🌹🌸🌷🌸🌷🌸🌷🌹🌷🌸🌷🌸🌹 💮💞🌹💮🌹💞💮💞🌹💮🏡🌹💞🏡🌹🇸🇦 🇾🇪 🇦🇪 💞🏡🌹💞🏡🌹💞🏡 💐 💐 💐 💐 💐 💐 💐 💐 💐 💐 💐	💞🏡🌹💞🏡🌹💞🏡🌹💞🏡💞🏡💞🌹 Glory be to God, praise be to God, God is only God, and God is great 💞🍀🍁🌲🌳🌴🌾🌿🍀🍁🌻🌼🌺🌻🌼💐🌸🥀🍃🌻🌼💐oke 🌸🌷🌹🌷🌸🌷🌸🌷🌸🌷🌸🌷🌸🌷🌸🌷🌸🌷🌸🌷🌸🌷🌸🌷🌸🌷🌸🌷🌸🌷🌸🌷🌸🌷🌸🌷🌸🌷🌸🌷🌸🌷🌸🌷🌸🌷🌸🌷🌸 🌸🌹🌸🌷🌸🌷🌹🌷🌸🌷🌸🌹🌸🌹🌷🌹💮🌹💞💮💞🌹💞🏡🌹🇸🇦 🇾🇪 🇦🇪 💞🏡💞🏡 💞🏡💞🏡 💐 💐 💐 💐 💐 💐 💐 💐 💐 💐 💐 💐 💐 💐 💐 💐 💐 💐 💐 💐 💐	2021-07-20	04:56:48	2021-07-20T04:56:48Z	1	0
278	كل عام وانتم بخير وصحه وسلامه يارب ❤🥰🌹	Happy New Year, health and peace, Lord ❤🥰🌹	2021-07-20	04:19:26	2021-07-20T04:19:26Z	1	0
279	اللهم صل وسلم على سيدنا محمد	O Allah, bless him on the prophet Mohammed	2021-07-20	04:03:08	2021-07-20T04:03:08Z	1	0
280	الكعبه مقدسه من دون كسوه	The Kaaba is sacred without cloth	2021-07-20	03:36:38	2021-07-20T03:36:38Z	0	1
281	بسم الله ما شاء الله تبارك الله	In the name of God, God willing, may God bless	2021-07-20	03:17:05	2021-07-20T03:17:05Z	1	0
282	هل يجوز الوقوف فوق الكعبة وجزاكم الله خير	Is it permissible to stand on top of the Kaaba? May Allah reward you well	2021-07-20	03:00:28	2021-07-20T03:00:28Z	2	2
283	اللهم احفظ الحرم	Oh God, save the Haram	2021-07-20	02:34:58	2021-07-20T02:34:58Z	1	1
284	غريبه فتحتو التعليقات	Strange, they opened the comments	2021-07-20	02:08:50	2021-07-20T02:08:50Z	0	0
285	ماشاء الله تبارك الله اتمنى اروح انا وامي وابي	God bless you, I wish I can go with my mother and my father	2021-07-20	01:49:45	2021-07-20T01:49:45Z	1	0
286	وين الملايين	Where are the millions?	2021-07-20	01:11:19	2021-07-20T01:12:24Z	0	2
287	اللهم ارزقنا حج بيتك الحرام	Oh God, grant us the pilgrimage of your Sacred house	2021-07-20	00:13:35	2021-07-20T00:13:35Z	2	0
